# Supplementary material for: Simulating the recent drought-induced mortality of European beech (Fagus sylvatica L.) and Norway spruce (Picea abies L.) in German forests
Source: Copernicus journal article supplement (doi:10.5194/egusphere-2025-1534), 2025-05-26
Supplement: Supplementary file 1 [file MaranoG_etal_GMD_SupplementaryMaterial1_rev1_notrackchange.pdf › MaranoG_etal_GMD_SupplementaryMaterial1_rev1_notrackchange.pdf]

# Simulating the recent drought-induced mortality of European beech (*Fagus sylvatica* L.) and Norway spruce (*Picea abies* L.) in German forests

Gina Marano<sup>1,2</sup>, Ulrike Hiltner<sup>1</sup>, Nikolai Knapp<sup>3</sup>, Harald Bugmann<sup>1</sup>

<sup>1</sup> Forest Ecology, Institute of Terrestrial Ecosystems, Department of Environmental Systems Science, ETH Zurich, 8092 Zürich, Switzerland

<sup>2</sup> Forest Resources and Management, Swiss Federal Research Institute for Forest, Snow and Landscape Research WSL, 8903 Birmensdorf, Switzerland

<sup>3</sup> Thünen Institute of Forest Ecosystems, 16225 Eberswalde, Germany

Correspondence to: Gina Marano ([gina.marano@wsl.ch](mailto:gina.marano@wsl.ch))

## Supplementary Material 1

### SM 1 | Climate data

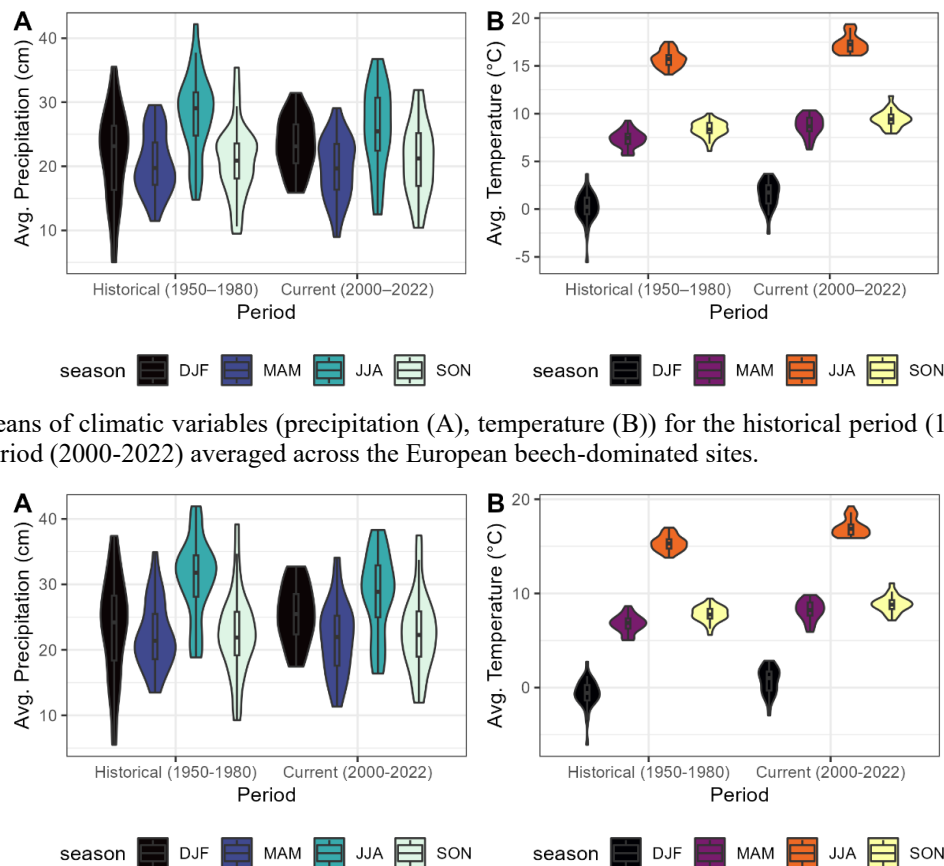

2.1 Maps of Available Water Capacity

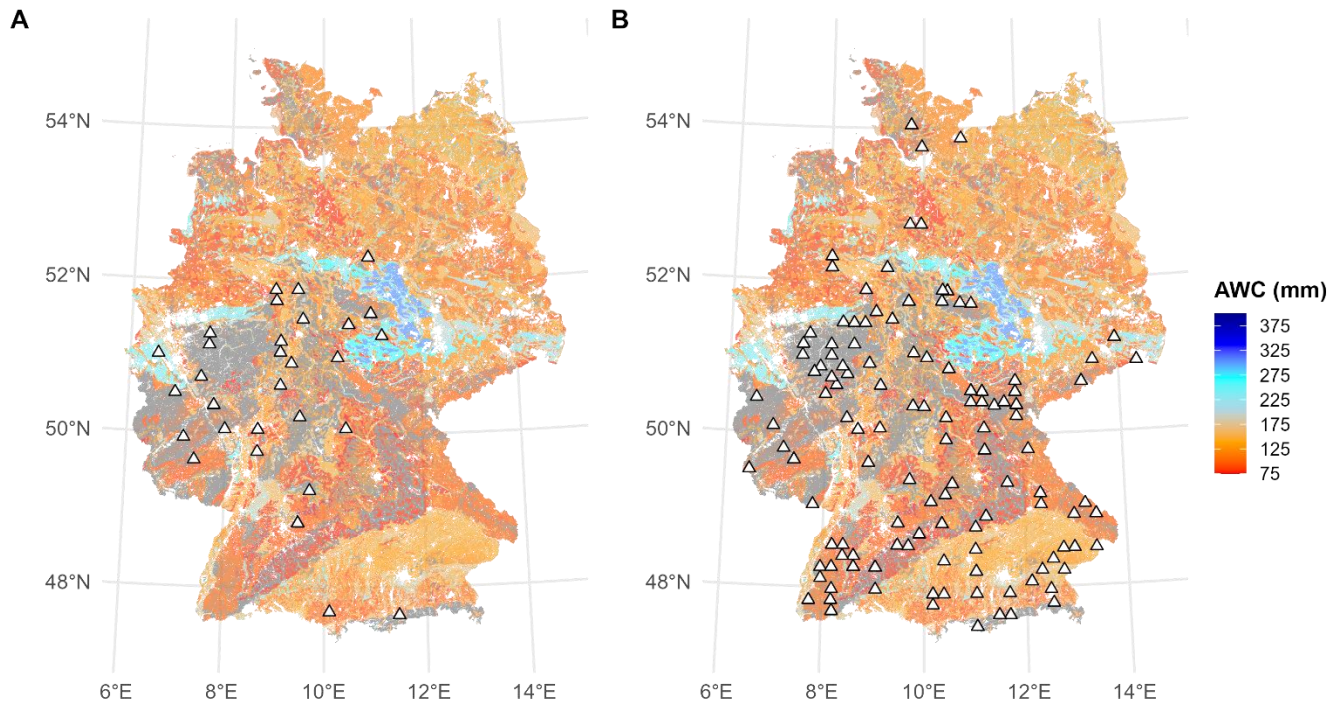

Figure S 2.1.1 – Available Water Capacity (AWC, mm, source: BGD) maps and overlaid ICP Level I (WZE) plots dominated by European beech (A) and Norway spruce (B).

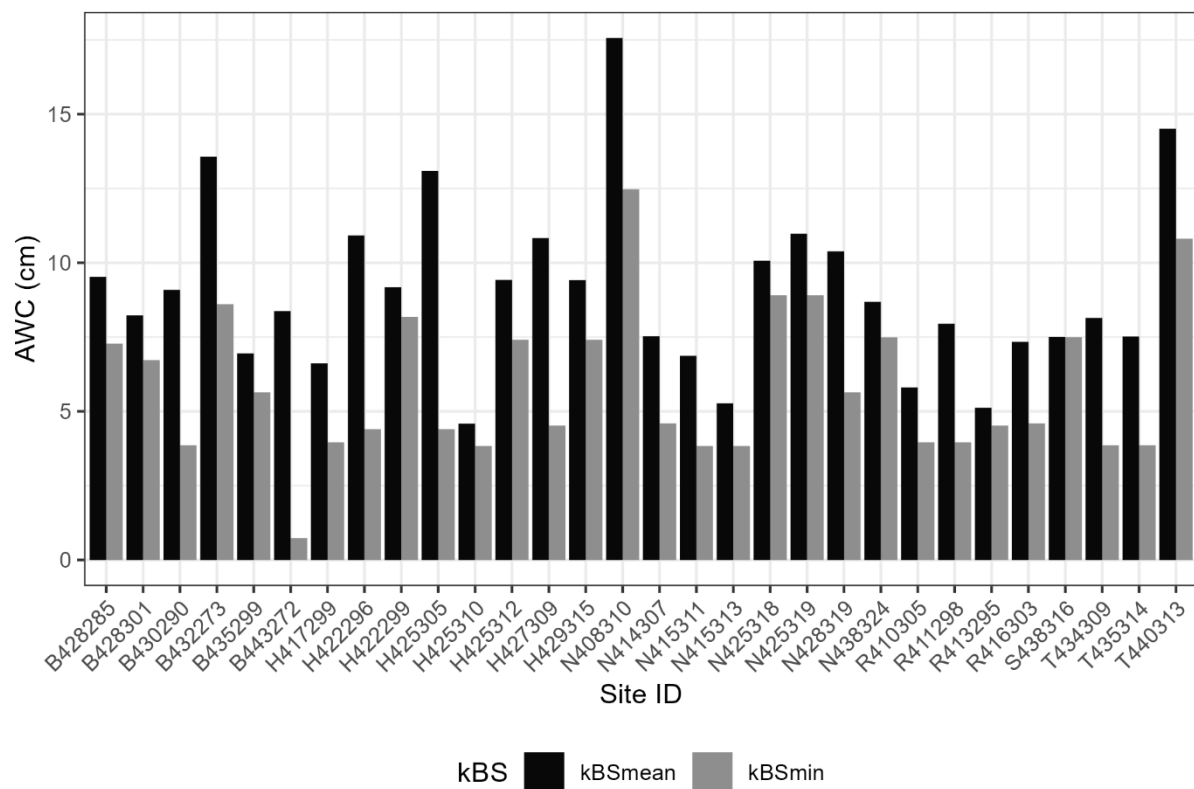

Figure S 2.1.2 – AWC values (cm, mean and minimum) extracted from the BGR map across the ICP Level I beech-dominated sites.

10 *Table S 2.1* – Soil moisture scenarios defined according to  $kBS_{min}$  and  $kBS_{mean}$ . The heterogeneity of each scenario is expressed via the sigma values ( $\sigma$ ) of the lognormal distribution.

| Scenario | $kBS_{min}$ | $kBS_{mean}$ | $\sigma$ | Scenario | $kBS_{min}$ | $kBS_{mean}$ | $\sigma$ | Scenario | $kBS_{min}$ | $kBS_{mean}$ | $\sigma$ |
|----------|-------------|--------------|----------|----------|-------------|--------------|----------|----------|-------------|--------------|----------|
| 1        | 7.5         | 7.5          | 0        | 38       | 12.5        | 37.5         | 1.098    | 75       | 22.5        | 35           | 0.441    |
| 2        | 7.5         | 10           | 0.287    | 39       | 12.5        | 40           | 1.163    | 76       | 22.5        | 37.5         | 0.510    |
| 3        | 7.5         | 12.5         | 0.510    | 40       | 15          | 15           | 0        | 77       | 22.5        | 40           | 0.575    |
| 4        | 7.5         | 15           | 0.693    | 41       | 15          | 17.5         | 0.154    | 78       | 25          | 25           | 0        |
| 5        | 7.5         | 17.5         | 0.847    | 42       | 15          | 20           | 0.287    | 79       | 25          | 27.5         | 0.095    |
| 6        | 7.5         | 20           | 0.980    | 43       | 15          | 22.5         | 0.405    | 80       | 25          | 30           | 0.182    |
| 7        | 7.5         | 22.5         | 1.098    | 44       | 15          | 25           | 0.510    | 81       | 25          | 32.5         | 0.262    |
| 8        | 7.5         | 25           | 1.203    | 45       | 15          | 27.5         | 0.606    | 82       | 25          | 35           | 0.336    |
| 9        | 7.5         | 27.5         | 1.299    | 46       | 15          | 30           | 0.693    | 83       | 25          | 37.5         | 0.405    |
| 10       | 7.5         | 30           | 1.386    | 47       | 15          | 32.5         | 0.773    | 84       | 25          | 40           | 0.470    |
| 11       | 7.5         | 32.5         | 1.466    | 48       | 15          | 35           | 0.847    | 85       | 27.5        | 27.5         | 0        |
| 12       | 7.5         | 35           | 1.540    | 49       | 15          | 37.5         | 0.916    | 86       | 27.5        | 30           | 0.087    |
| 13       | 7.5         | 37.5         | 1.609    | 50       | 15          | 40           | 0.980    | 87       | 27.5        | 32.5         | 0.167    |
| 14       | 7.5         | 40           | 1.673    | 51       | 17.5        | 17.5         | 0        | 88       | 27.5        | 35           | 0.241    |
| 15       | 10          | 10           | 0        | 52       | 17.5        | 20           | 0.133    | 89       | 27.5        | 37.5         | 0.310    |
| 16       | 10          | 12.5         | 0.223    | 53       | 17.5        | 22.5         | 0.251    | 90       | 27.5        | 40           | 0.374    |
| 17       | 10          | 15           | 0.405    | 54       | 17.5        | 25           | 0.356    | 91       | 30          | 30           | 0        |
| 18       | 10          | 17.5         | 0.559    | 55       | 17.5        | 27.5         | 0.451    | 92       | 30          | 32.5         | 0.080    |
| 19       | 10          | 20           | 0.693    | 56       | 17.5        | 30           | 0.538    | 93       | 30          | 35           | 0.154    |
| 20       | 10          | 22.5         | 0.810    | 57       | 17.5        | 32.5         | 0.619    | 94       | 30          | 37.5         | 0.223    |
| 21       | 10          | 25           | 0.916    | 58       | 17.5        | 35           | 0.693    | 95       | 30          | 40           | 0.287    |
| 22       | 10          | 27.5         | 1.011    | 59       | 17.5        | 37.5         | 0.762    | 96       | 32.5        | 32.5         | 0        |
| 23       | 10          | 30           | 1.098    | 60       | 17.5        | 40           | 0.826    | 97       | 32.5        | 35           | 0.074    |
| 24       | 10          | 32.5         | 1.178    | 61       | 20          | 20           | 0        | 98       | 32.5        | 37.5         | 0.143    |
| 25       | 10          | 35           | 1.252    | 62       | 20          | 22.5         | 0.117    | 99       | 32.5        | 40           | 0.207    |
| 26       | 10          | 37.5         | 1.321    | 63       | 20          | 25           | 0.223    | 100      | 35          | 35           | 0        |
| 27       | 10          | 40           | 1.386    | 64       | 20          | 27.5         | 0.318    | 101      | 35          | 37.5         | 0.068    |
| 28       | 12.5        | 12.5         | 0        | 65       | 20          | 30           | 0.405    | 102      | 35          | 40           | 0.133    |
| 29       | 12.5        | 15           | 0.182    | 66       | 20          | 32.5         | 0.485    | 103      | 37.5        | 37.5         | 0        |
| 30       | 12.5        | 17.5         | 0.336    | 67       | 20          | 35           | 0.559    | 104      | 37.5        | 40           | 0.064    |
| 31       | 12.5        | 20           | 0.470    | 68       | 20          | 37.5         | 0.628    | 105      | 40          | 40           | 0        |
| 32       | 12.5        | 22.5         | 0.587    | 69       | 20          | 40           | 0.693    |          |             |              |          |
| 33       | 12.5        | 25           | 0.693    | 70       | 22.5        | 22.5         | 0        |          |             |              |          |
| 34       | 12.5        | 27.5         | 0.788    | 71       | 22.5        | 25           | 0.105    |          |             |              |          |
| 35       | 12.5        | 30           | 0.875    | 72       | 22.5        | 27.5         | 0.200    |          |             |              |          |
| 36       | 12.5        | 32.5         | 0.955    | 73       | 22.5        | 30           | 0.287    |          |             |              |          |
| 37       | 12.5        | 35           | 1.029    | 74       | 22.5        | 32.5         | 0.367    |          |             |              |          |

2.2 Spatial heterogeneity level ( $\sigma$ ) of soil moisture and model performance

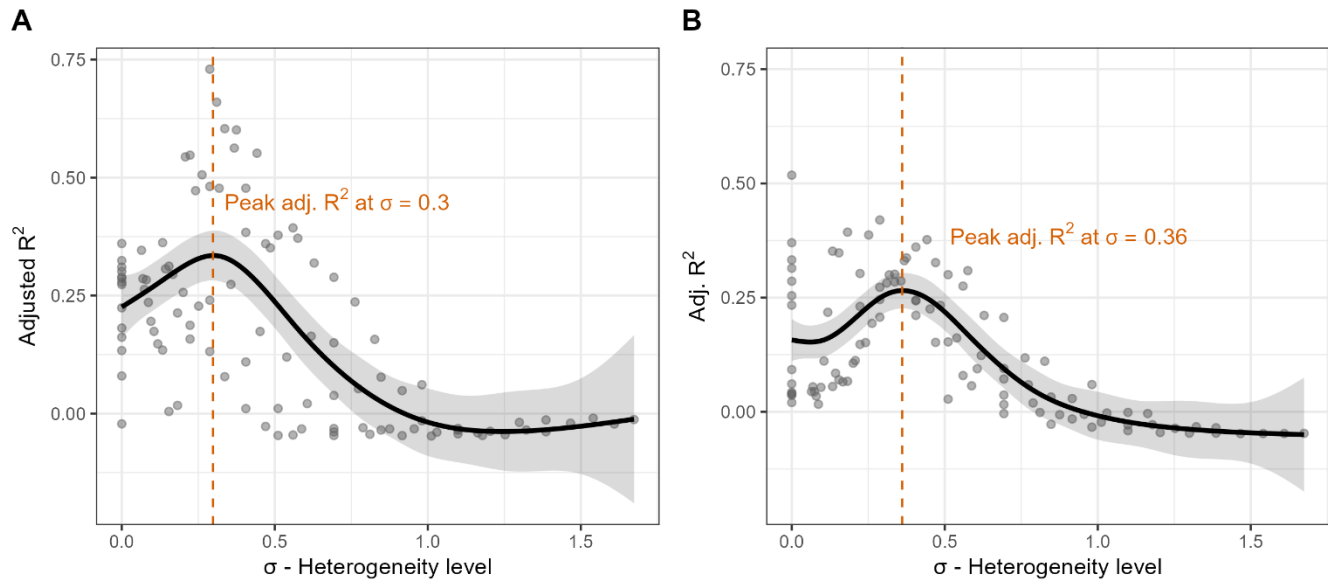

15 Figure S 2.2.1 – Relationship between heterogeneity level of soil moisture ( $\sigma$ ) and model performance (Adjusted  $R^2$ ) for *Fagus sylvatica* (A) and *Picea abies* (B). A generalized additive model (GAM) was fitted to predict  $R^2$  as a smooth function of  $\sigma$ . The shaded area indicates the 95% confidence interval of the GAM. Model performance peaked at  $\sigma \approx 0.3$  and  $0.36$ , respectively, for *Fagus sylvatica* and for *Picea abies* and declined thereafter, suggesting optimal model fit under intermediate (*Fagus*) and more pronounced (*Picea*) heterogeneity levels.

20 *Table S 2.2* - Summary of Generalized Additive Models (GAMs) fitted to predict adjusted R<sup>2</sup> as a function of soil moisture heterogeneity ( $\sigma$ ) for *Fagus sylvatica* and *Picea abies*. edf = estimated degrees of freedom, red.df = reference degrees of freedom. Parametric and smooth term estimates are provided along with model statistics including adjusted R<sup>2</sup>, deviance explained (D), restricted maximum likelihood (REML), scale estimate (scale), and sample size (n). All smooth terms were highly significant ( $p < 0.001$ ). All GAMs were fitted using a Gaussian family with an identity link function.

| Species                |                     |           |          |            |         |         |
|------------------------|---------------------|-----------|----------|------------|---------|---------|
| <i>Fagus sylvatica</i> | Parametric term     | Component | Estimate | Std. error | t-value | p-value |
|                        |                     | Intercept | 0.2      | 0.01       | 12.5    | <2e-16  |
|                        | Smooth term         |           | edf      | red.df.    | F-value |         |
|                        |                     | $\sigma$  | 4.4      | 9          | 9.9     | <2e-16  |
|                        | Model statistics    |           |          |            |         |         |
|                        | adj. R <sup>2</sup> | D         | REML     | scale      | n       |         |
|                        | 0.46                | 48.4%     | -41.7    | 0.02       | 105     |         |
| <i>Picea abies</i>     | Parametric term     | Component | Estimate | Std. error | t-value |         |
|                        |                     | Intercept | 0.1      | 0.01       | 14.1    | <2e-16  |
|                        | Smooth term         |           | edf      | red.df.    | F-value |         |
|                        |                     | $\sigma$  | 5.5      | 9          | 13.3    | <2e-16  |
|                        | Model statistics    |           |          |            |         |         |
|                        | adj. R <sup>2</sup> | D         | REML     | scale      | n       |         |
|                        | 0.53                | 55.9%     | -83.2    | 0.01       | 105     |         |

25

### 2.3 Base annual probability of Bark beetle outbreaks

We derived the base annual probability of bark beetle outbreaks ( $P_{\text{bark}}$ ) by adapting the theoretical probability of bark beetle disturbance in spruce-dominated forests (Hlásny et al., 2021, their Fig. 4 and Appendix 2) to baseline climate conditions (1979–1990) in Germany. The method we used combined fixed percentages for the lower classes and an exponential progression for the higher classes, as follows:

1. *No Spruce*: this category represents the absence of spruce; hence the base probability of a bark beetle outbreak is 0%.
2. *Very Low*: we assigned to this class the first 5% of the range to capture very rare occurrences of bark beetle attacks.
3. *Low*: this category covers the next 10% (from 6 to 15%), which reflects low but non-negligible occurrences of outbreaks.
4. *Medium, High, and Very High*: the remaining 85% of the scale (from 16 to 100%) was divided between the three categories using an exponential progression. This approach was chosen to smoothly reflect the increasing intensity or abundance of spruce, with progressively larger ranges as we move towards the higher classes. Furthermore, it ensures that the higher classes have larger ranges, which is appropriate for a classification where higher abundances are typically more variable.

The progression was defined using a base factor that determines how the range grows as we move from one class to the next. The exponential progression  $R_k$  (Eq. SM 1) represents the upper range limit of the  $k^{\text{th}}$  class, with  $k = 1, 2, 3$ , which corresponds to the *Medium, High, and Very High* classes, respectively.  $R_0$  represents the initial range size (i.e., 19 units for *Medium*, 31 units for *High* and 35 units for *Very High*),  $\lambda$  is the exponential growth factor and  $k$  is the class index.

$$R_k = R_0 \cdot \lambda^k \tag{SM 1}$$

Given that the total span for the upper classes must equal to 85 units (i.e., covering the range [16,100]), we selected  $\lambda = 1.5$  which ensures that the cumulative ranges (i.e.  $19 + 31 + 35 = 85$ ) cover the full interval. The value  $\lambda = 1.5$  thus controls the exponential increase in range width from *Medium* to *Very High*. The range [16,100] is therefore split into three sections such that the total span is covered by the classes with exponentially increasing intervals.

*Table S 2.3* - Base annual probability for the six bark beetle outbreak classes with estimated ranges and midpoints. The original class definitions are derived from Hlasny et al. (2021).

| Class            | Range (%) | Midpoint (%) |
|------------------|-----------|--------------|
| <i>No spruce</i> | 0         | 0            |
| <i>Very Low</i>  | 0-5       | 2.5          |
| <i>Low</i>       | 6-15      | 10.5         |
| <i>Medium</i>    | 16-34     | 25           |
| <i>High</i>      | 35-65     | 50           |
| <i>Very High</i> | 66-100    | 83           |

55 SM 3.1 | ICP Level I data overview

3.1.1. Beech sites

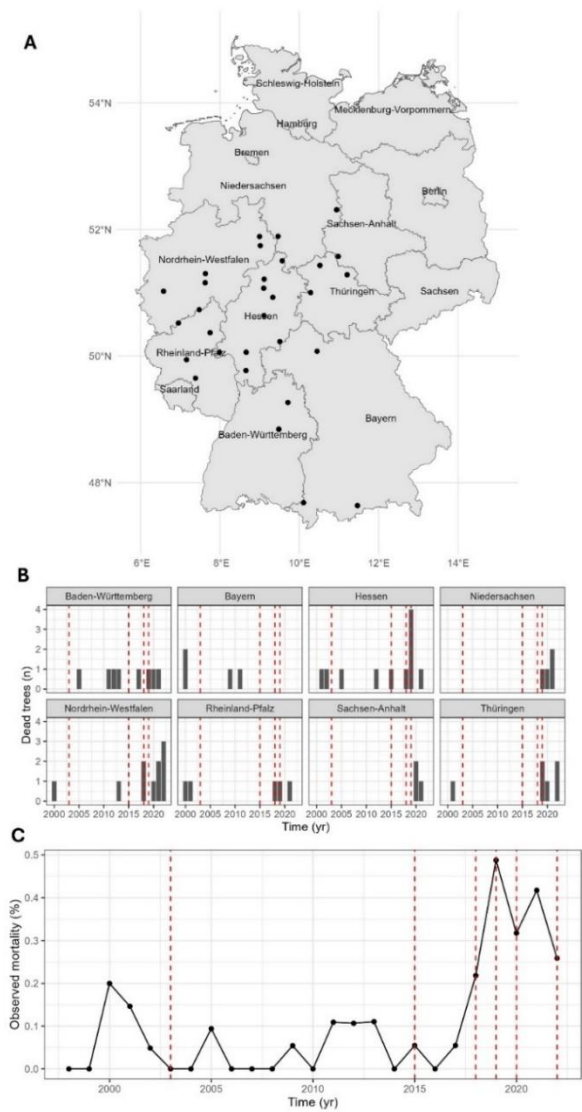

60 *Figure S 3.1.1* – (A) Locations of ICP Forest Level I network plots in European beech (*Fagus sylvatica* L.)-dominated stands across the study region. (B) Total number of dead beech trees recorded within these plots over the observation period. (C) Observed mortality rate of beech trees, derived from repeated assessments at the same network plots.



3.1.2. Spruce sites

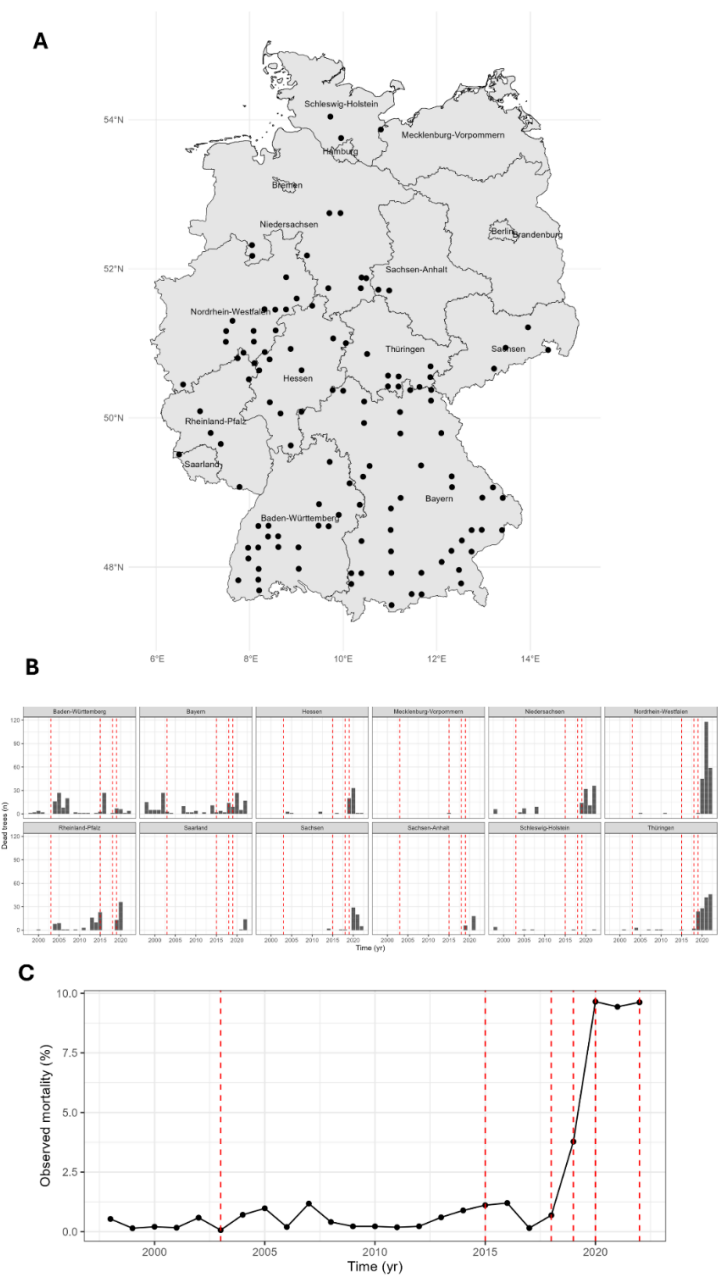

65 Figure S 3.1.2. – (A) Locations of ICP Forest Level I network plots in Norway spruce (*Picea abies* L.)-dominated stands across the study region. (B) Total number of dead beech trees recorded within these plots over the observation period. (C) Observed mortality rate of beech trees, derived from repeated assessments at the same network plots.

70 3.2.1. Beech sites

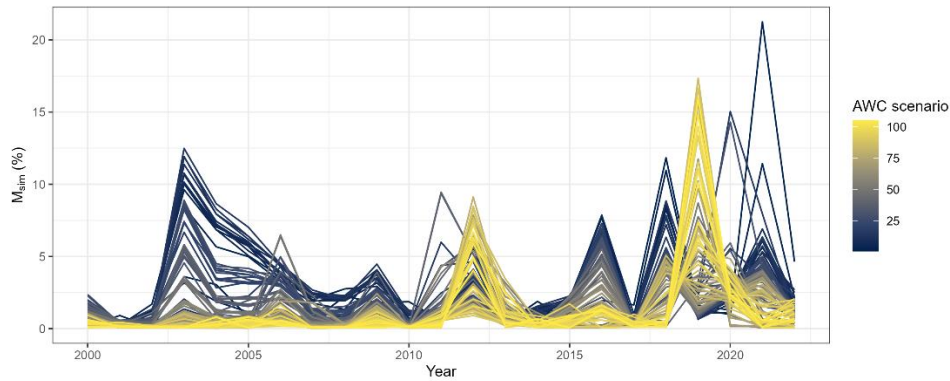

Figure S 3.2.1.1. – Simulated mortality rate over time averaged across beech sites and grouped by soil scenario. We only show trees with a DBH > 40 cm.

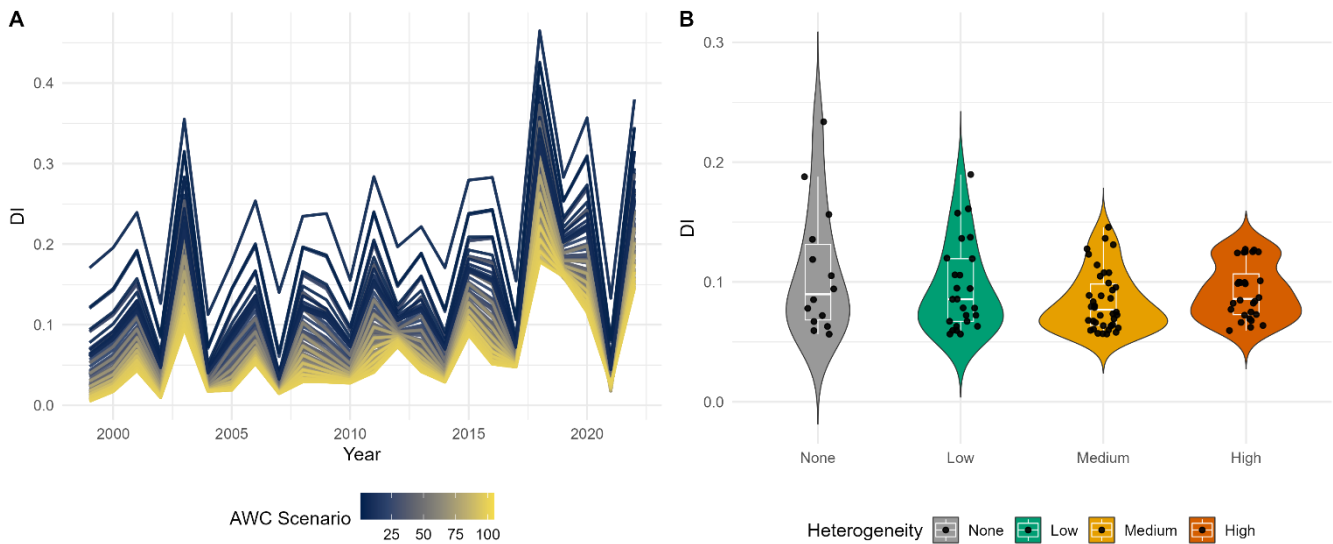

75

Figure S 3.2.1.2. – (A) ForClim drought index calculated at the seasonal (i.e. April-October, growing season) timestep for each AWC scenario, (B) and aggregated across heterogeneity classes.

3.2.2. Spruce sites

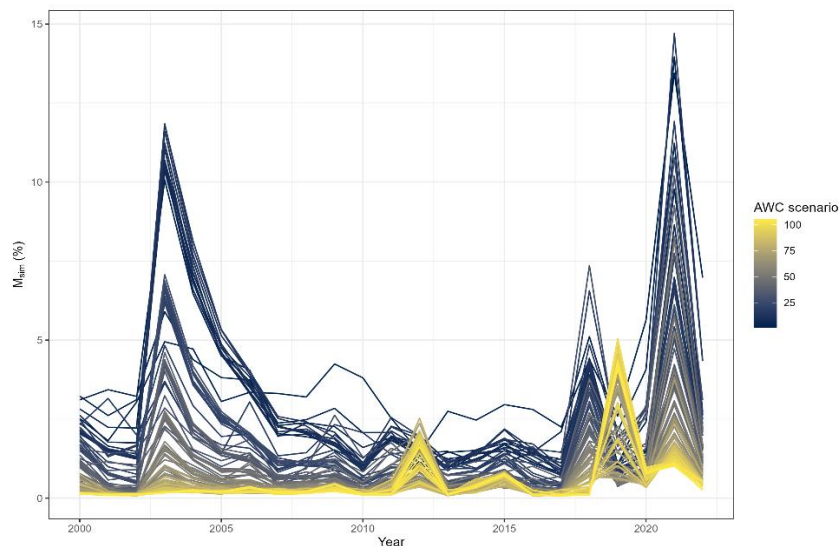

80 *Figure S 3.2.2.1.* – Simulated mortality rate over time averaged across spruce sites and grouped soil scenario. We only show trees with a DBH > 40 cm.

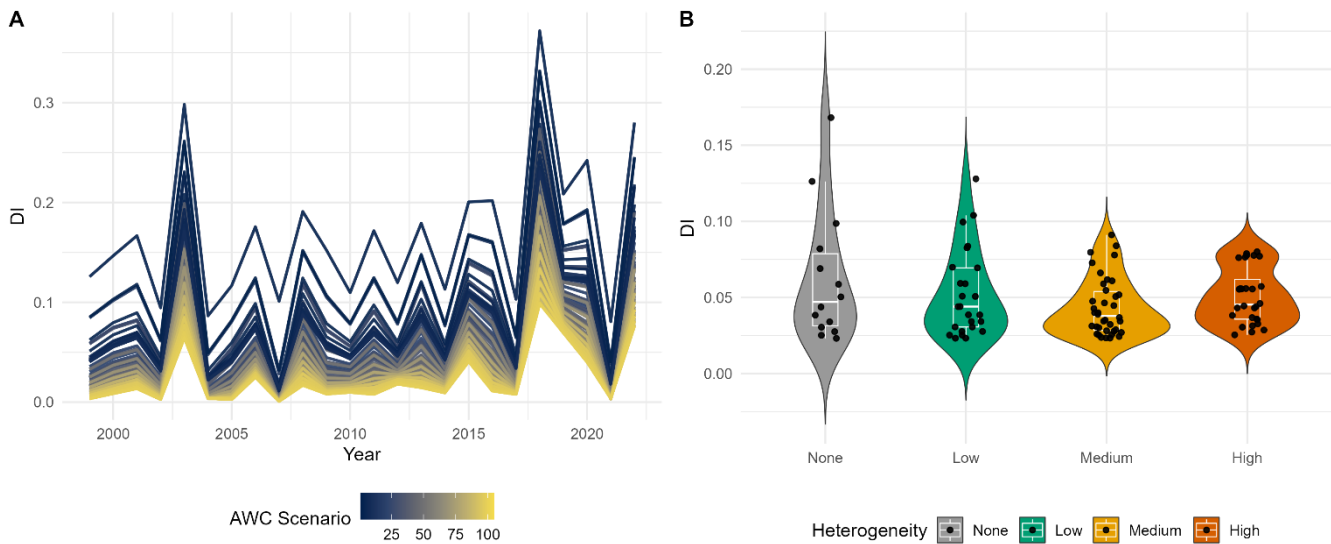

85 *Figure S 3.2.2.2.* – (A) ForClim drought index calculated at the yearly timestep for each AWC scenario, (B) and aggregated across heterogeneity classes.

3.3.1 Mortality period

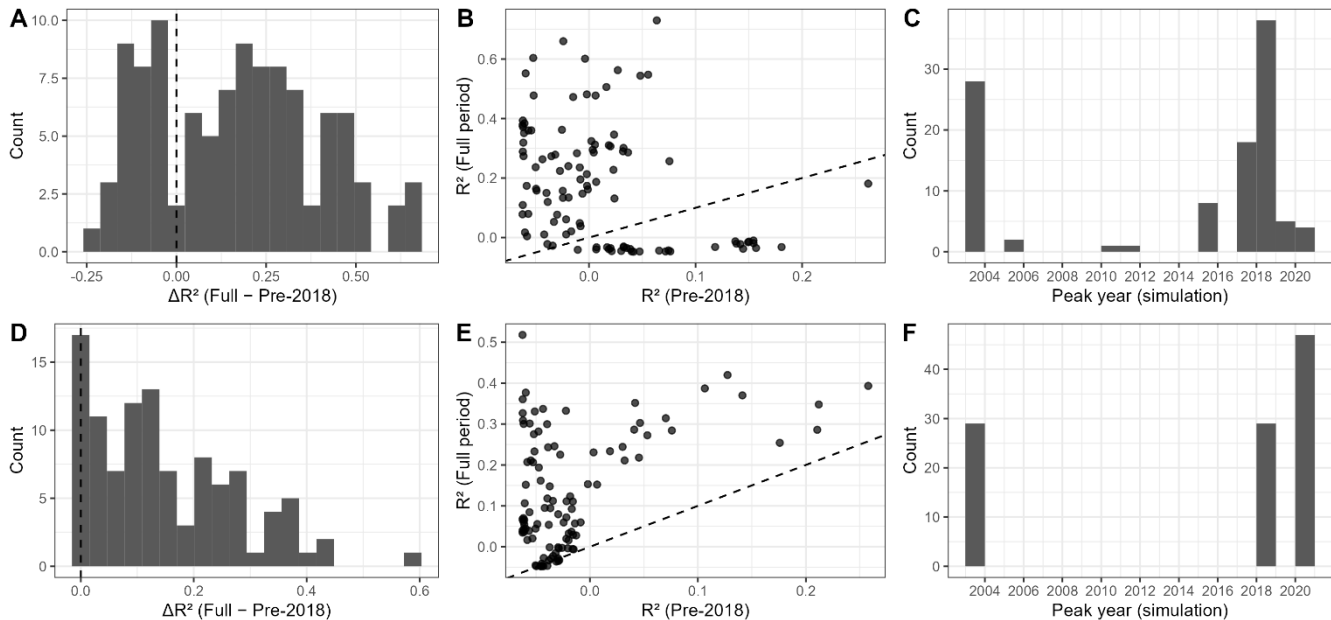

90 *Figure S 3.3.1. – Comparison of model performance and simulated mortality timing for *Fagus sylvatica* (A–C) and *Picea**  
*abies* (D–F) when evaluated for the full simulation period (2000–2022) versus the pre-2018 period. (A, D) Distribution of

95 changes in explanatory power ( $\Delta R^2 = R^2_{\text{full}} - R^2_{\text{pre-2018}}$ ) across the 105 AWC scenarios. Positive values indicate improved model

performance when including the post-2017 drought years. (B, E) Relationship between model performance for the full period

and the pre-2018 period; the 1:1 line (dashed) denotes equal explanatory power. Most scenarios lie above this line, showing

that the extreme drought years enhance model discrimination rather than biasing fit statistics. (C, F) Distribution of simulated

mortality peak years across AWC scenarios.

3.3.2 Predisposing and inciting factors

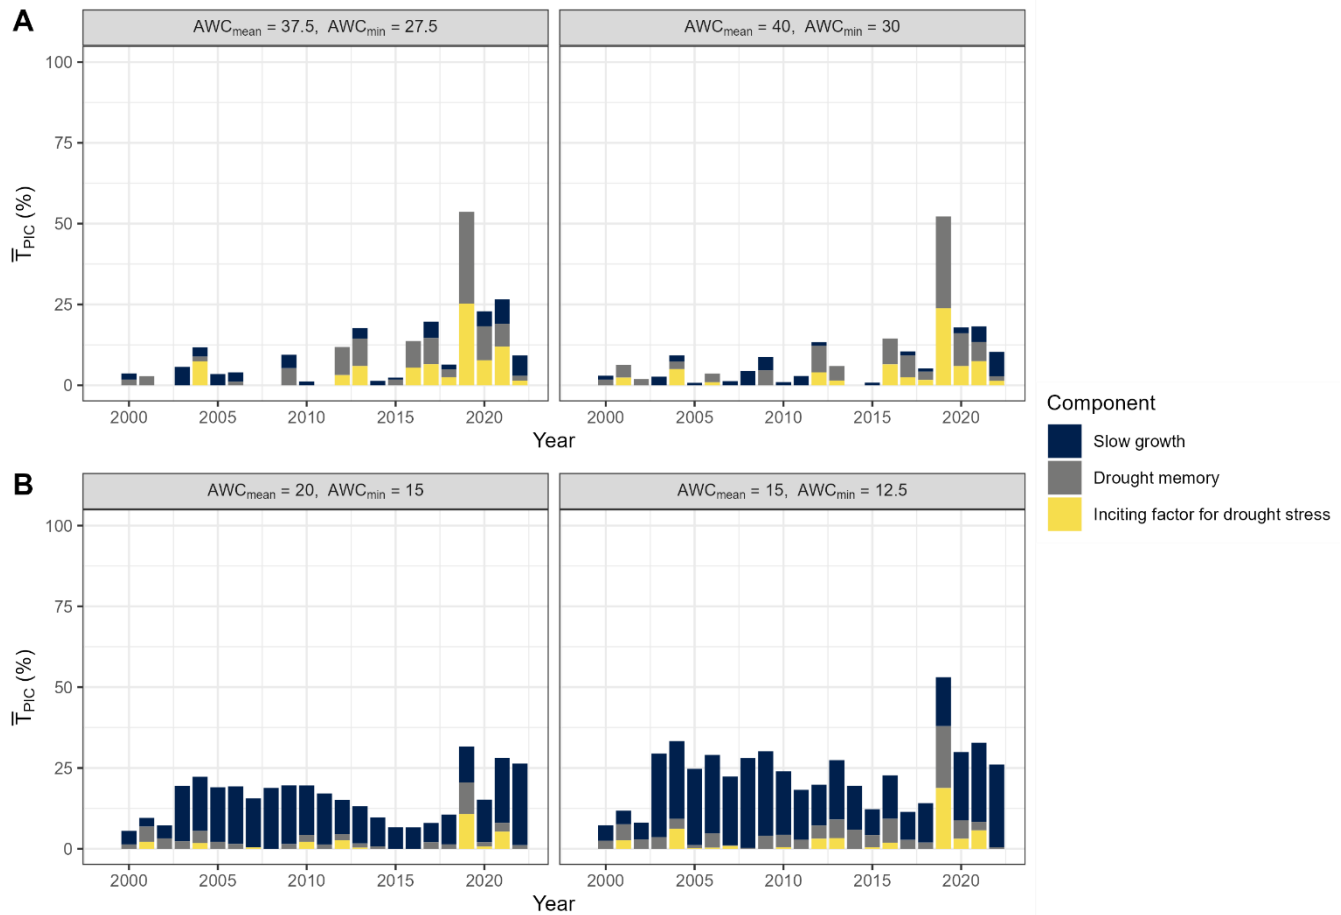

100 *Figure S 3.3.2. – Fraction of dead trees affected by predisposing and inciting stress factors ( $\bar{T}_{PIC}$ , %) simulated by ForClim*  
*v4.2 for (A) *Fagus sylvatica* and (B) *Picea abies* across two soil water availability scenarios. Bars represent annual stand-level*  
*averages of trees flagged for (i) slow growth (dark blue), (ii) drought memory (grey), and (iii) inciting drought stress (yellow).*  
*Each panel corresponds to the best performing AWC scenario, i.e. scenarios 89 and 95 for *Fagus sylvatica* and 29 and 42 for*  
**Picea abies*, resulting from the combination of mean and minimum available water capacity, representing different levels of*  
105 *soil water storage and its local spatial heterogeneity.*

3.3.3 Spatial mortality

To assess whether observed and simulated spruce mortality exhibited spatial patterns, we quantified spatial autocorrelation using both global and local statistics. All analyses were performed in R (version  $\geq 4.3$ ) with the packages *sf*, *spdep*, and *ggplot2*.  
110 Site coordinates were projected in the ETRS89–LAEA Europe coordinate system (EPSG 3035), and spatial relationships were

defined using a 5-nearest-neighbour (kNN) weighting scheme based on Euclidean distances. Global spatial autocorrelation was evaluated with Moran's I ((Moran, 1950)), computed from 999 random permutations of mortality values. This statistic measures the similarity of nearby observations, with positive values indicating spatial clustering, zero corresponding to random spatial structure, and negative values indicating spatial dispersion. Local Indicators of Spatial Association (LISA; Anselin, 1995) were used to map site-level clusters of high or low mortality. Sites with significant ( $p < 0.05$ ) local Moran's I values were classified as "High-High," "Low-Low," "High-Low," or "Low-High." For European beech, both observed and simulated mortality showed very weak and non-significant global autocorrelation (Observed  $I = 0.06$ ,  $p = 0.11$ ; Simulated  $I = -0.13$ ,  $p = 0.88$  (Figure S 3.3.3.1, B). Only one small, non-significant "High-High" cluster was detected, indicating largely random spatial distribution (Figure S 3.3.3.1, C). Together, these results demonstrate the absence of coherent spatial structure in both observed and simulated beech mortality, consistent with stochastic mortality processes and broad-scale environmental drivers rather than localized spatial effects. For Norway spruce, both observed and simulated mortality exhibited weak but statistically significant positive spatial autocorrelation (Observed  $I = 0.15$ ,  $p = 0.005$ ; Simulated  $I = 0.09$ ,  $p = 0.024$ ; Figure S 3.3.3.2 B). This indicates that sites with high or low spruce mortality tended to be located near other sites with similar mortality levels, although the strength of this clustering was modest. The LISA revealed a few small but distinct "High-High" and "Low-Low" clusters of observed mortality, mainly concentrated in central and southern Germany (Figure S 3.3.3.2 C). In contrast, simulated mortality showed only sparse and spatially inconsistent local clusters (Figure S 3.3.3.2 D). Overall, these results suggest that observed spruce mortality exhibited weak but significant spatial aggregation, possibly reflecting regionally coherent environmental stressors or disturbance legacies (e.g., bark beetle outbreaks), whereas simulated mortality reproduced the general magnitude of mortality but not its localized spatial structure.

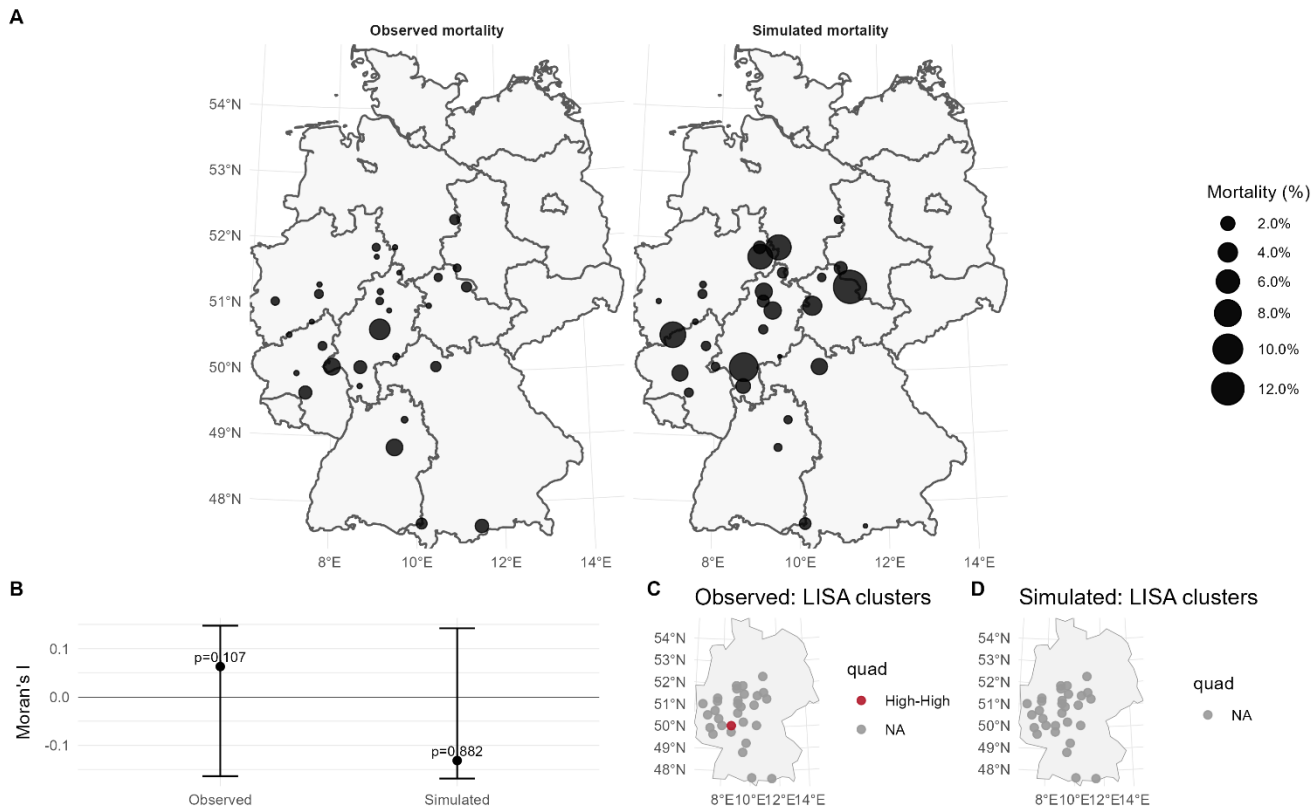

**Figure S 3.3.3.1. – (A)** Maps of observed (left) and simulated (right) mean mortality (%) across all European beech dominated ICP-Level I monitoring sites in Germany. Circle size is proportional to site-level mortality. **(B)** Global spatial autocorrelation (Moran's I, 999 permutations, 5-nearest-neighbour weighting). Both observed ( $I = 0.06$ ,  $p = 0.11$ ) and simulated ( $I = -0.13$ ,  $p = 0.88$ ) mortality show no significant spatial autocorrelation. **(C–D)** Local Indicators of Spatial Association (LISA) cluster maps for observed (C) and simulated (D) mortality.

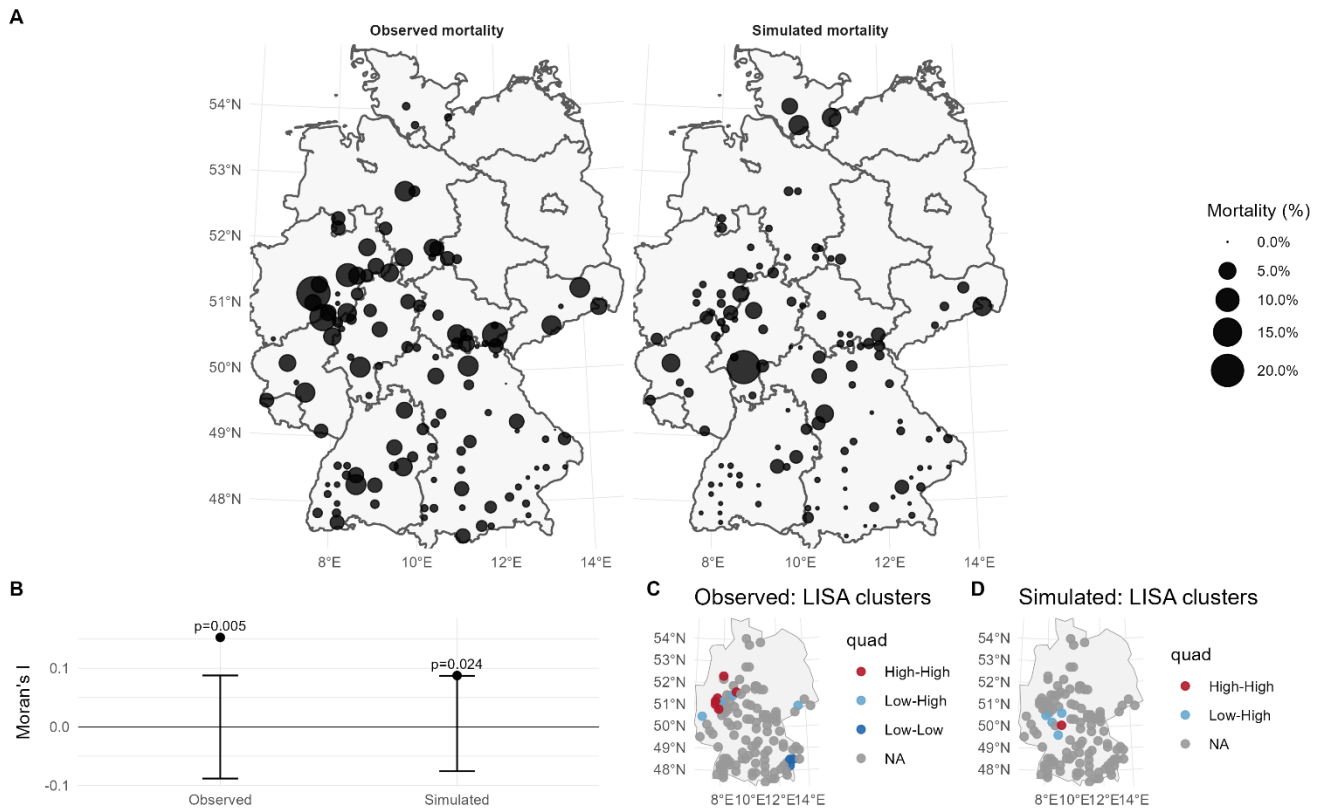

*Figure S 3.3.3.2. – (A) Maps of observed (left) and simulated (right) mean mortality (%) across all Norway spruce dominated ICP-Level I monitoring sites in Germany. Circle size is proportional to site-level mortality. (B) Global spatial autocorrelation (Moran's I, 999 permutations, 5-nearest-neighbour weighting). Both observed ( $I = 0.06$ ,  $p = 0.11$ ) and simulated ( $I = -0.13$ ,  $p = 0.88$ ) mortality show no significant spatial autocorrelation. (C–D) Local Indicators of Spatial Association (LISA) cluster maps for observed (C) and simulated (D) mortality.*



A

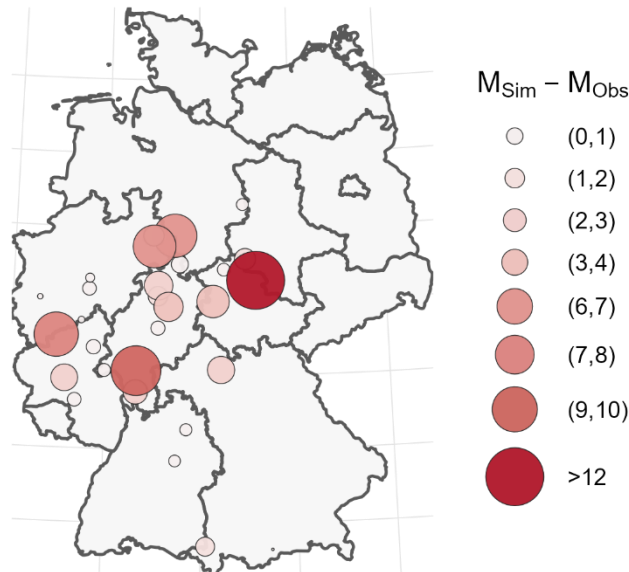

B

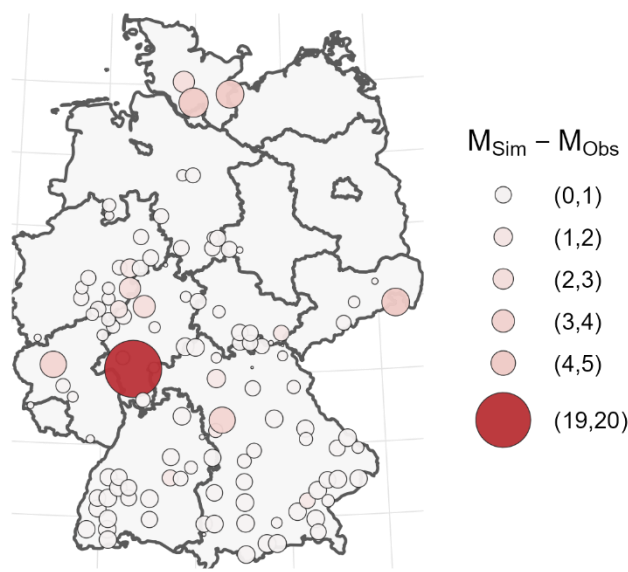

145

Figure S 3.3.3.3. – Absolute difference between simulated and observed mortality rates averaged over the period 2000–2022 for each (A) beech-dominated and (B) spruce-dominated site for dominant trees (DBH > 40 cm). Circle size and color intensity indicate the magnitude of the absolute difference between simulated and observed mortality rates. Lighter colors and smaller circles represent smaller deviations, while darker and larger circles represent larger deviations. Classes not shown in the legend are empty. For beech 15 sites fell within the lowest overestimation class (0–1%), while only a few sites (n = 4 each) showed moderate overestimation (1–3%). Higher discrepancies (>6%) however occurred only at isolated locations (n = 4), indicating that substantial overprediction was spatially limited.

150

3.3.4. Scenario-specific model performance for the beech sites

155

Table S 3.3.4 – Summary of the model statistics (MAE, RMSE,  $R^2_{adj}$ , Slope, Intercept and P-value) for each scenario for the beech dominated sites. Highlighted in red are the two best performing scenarios according to their  $R^2_{adj}$ .

| Scenario | MAE   | RMSE  | $R^2_{adj}$ | Slope  | Intercept | P-Value |
|----------|-------|-------|-------------|--------|-----------|---------|
| 1        | 2.548 | 5.036 | 0.181       | 15.545 | 0.953     | 0.025   |
| 2        | 1.962 | 3.394 | 0.131       | 8.829  | 1.088     | 0.050   |
| 3        | 2.792 | 3.817 | -0.046      | -0.681 | 2.974     | 0.876   |
| 4        | 3.076 | 4.185 | -0.032      | -2.614 | 3.479     | 0.576   |
| 5        | 3.093 | 4.178 | -0.035      | -2.333 | 3.461     | 0.617   |

|    |       |       |        |        |       |       |
|----|-------|-------|--------|--------|-------|-------|
| 6  | 3.019 | 4.213 | -0.015 | -3.869 | 3.559 | 0.424 |
| 7  | 3.041 | 4.129 | -0.032 | -2.591 | 3.441 | 0.575 |
| 8  | 3.057 | 4.243 | -0.038 | -2.143 | 3.410 | 0.658 |
| 9  | 2.918 | 4.090 | -0.019 | -3.545 | 3.429 | 0.449 |
| 10 | 3.001 | 4.176 | -0.014 | -3.902 | 3.551 | 0.411 |
| 11 | 3.138 | 4.373 | -0.020 | -3.660 | 3.662 | 0.463 |
| 12 | 3.196 | 4.456 | -0.010 | -4.396 | 3.804 | 0.385 |
| 13 | 3.207 | 4.540 | -0.022 | -3.752 | 3.739 | 0.477 |
| 14 | 3.380 | 4.753 | -0.013 | -4.563 | 4.006 | 0.404 |
| 15 | 2.087 | 4.051 | 0.273  | 14.834 | 0.573 | 0.006 |
| 16 | 1.548 | 2.312 | 0.158  | 5.882  | 1.004 | 0.034 |
| 17 | 2.089 | 2.667 | 0.010  | 2.962  | 1.865 | 0.279 |
| 18 | 2.262 | 2.906 | -0.045 | -0.617 | 2.443 | 0.837 |
| 19 | 2.326 | 3.125 | -0.046 | -0.519 | 2.495 | 0.881 |
| 20 | 2.203 | 3.010 | -0.044 | -0.923 | 2.418 | 0.784 |
| 21 | 2.203 | 2.987 | -0.047 | -0.421 | 2.363 | 0.899 |
| 22 | 2.133 | 2.936 | -0.048 | 0.014  | 2.244 | 0.997 |
| 23 | 2.246 | 3.126 | -0.043 | -1.084 | 2.481 | 0.761 |
| 24 | 2.210 | 3.013 | -0.046 | -0.522 | 2.383 | 0.876 |
| 25 | 2.285 | 3.131 | -0.045 | -0.807 | 2.490 | 0.818 |
| 26 | 2.314 | 3.197 | -0.035 | -1.808 | 2.631 | 0.615 |
| 27 | 2.277 | 3.152 | -0.039 | -1.501 | 2.560 | 0.673 |
| 28 | 2.066 | 3.871 | 0.134  | 10.429 | 1.026 | 0.048 |
| 29 | 1.435 | 2.297 | 0.017  | 3.398  | 1.162 | 0.252 |
| 30 | 1.608 | 2.187 | 0.078  | 3.919  | 1.278 | 0.105 |
| 31 | 1.687 | 2.221 | -0.027 | 1.511  | 1.630 | 0.526 |
| 32 | 1.777 | 2.379 | -0.033 | 1.419  | 1.730 | 0.587 |
| 33 | 1.712 | 2.348 | -0.039 | 1.099  | 1.701 | 0.679 |
| 34 | 1.652 | 2.301 | -0.030 | 1.564  | 1.589 | 0.556 |
| 35 | 1.671 | 2.293 | -0.033 | 1.410  | 1.625 | 0.587 |
| 36 | 1.586 | 2.150 | -0.032 | 1.310  | 1.552 | 0.584 |
| 37 | 1.644 | 2.231 | -0.040 | 0.985  | 1.646 | 0.692 |
| 38 | 1.699 | 2.256 | -0.035 | 1.196  | 1.677 | 0.625 |
| 39 | 1.632 | 2.213 | -0.041 | 0.887  | 1.645 | 0.718 |
| 40 | 1.610 | 2.882 | -0.022 | 2.848  | 1.388 | 0.474 |
| 41 | 1.325 | 2.385 | 0.004  | 3.357  | 1.035 | 0.307 |
| 42 | 1.310 | 2.035 | 0.240  | 6.301  | 0.709 | 0.010 |
| 43 | 1.448 | 1.898 | 0.109  | 3.660  | 1.146 | 0.068 |
| 44 | 1.466 | 1.981 | 0.011  | 2.387  | 1.310 | 0.279 |
| 45 | 1.429 | 1.958 | 0.021  | 2.602  | 1.248 | 0.238 |

|    |       |       |       |        |        |       |
|----|-------|-------|-------|--------|--------|-------|
| 46 | 1.375 | 1.894 | 0.038 | 2.843  | 1.167  | 0.186 |
| 47 | 1.353 | 1.867 | 0.053 | 3.050  | 1.122  | 0.151 |
| 48 | 1.285 | 1.808 | 0.077 | 3.365  | 1.018  | 0.107 |
| 49 | 1.206 | 1.678 | 0.049 | 2.695  | 1.013  | 0.160 |
| 50 | 1.295 | 1.765 | 0.061 | 2.957  | 1.074  | 0.134 |
| 51 | 1.403 | 2.656 | 0.080 | 6.011  | 0.796  | 0.103 |
| 52 | 1.230 | 2.351 | 0.134 | 6.419  | 0.581  | 0.048 |
| 53 | 1.139 | 2.064 | 0.228 | 6.834  | 0.445  | 0.012 |
| 54 | 1.245 | 1.695 | 0.274 | 5.017  | 0.784  | 0.006 |
| 55 | 1.272 | 1.755 | 0.174 | 4.320  | 0.897  | 0.027 |
| 56 | 1.073 | 1.462 | 0.120 | 3.083  | 0.838  | 0.059 |
| 57 | 1.146 | 1.591 | 0.164 | 3.865  | 0.822  | 0.031 |
| 58 | 1.066 | 1.534 | 0.150 | 3.730  | 0.759  | 0.038 |
| 59 | 1.084 | 1.559 | 0.236 | 4.574  | 0.680  | 0.011 |
| 60 | 1.017 | 1.432 | 0.157 | 3.471  | 0.737  | 0.035 |
| 61 | 1.403 | 2.857 | 0.162 | 8.541  | 0.504  | 0.032 |
| 62 | 1.256 | 2.712 | 0.148 | 7.915  | 0.425  | 0.040 |
| 63 | 1.108 | 2.043 | 0.187 | 6.325  | 0.462  | 0.023 |
| 64 | 1.023 | 1.621 | 0.477 | 7.070  | 0.331  | 0.000 |
| 65 | 0.999 | 1.412 | 0.384 | 5.114  | 0.530  | 0.001 |
| 66 | 0.898 | 1.320 | 0.351 | 4.762  | 0.470  | 0.002 |
| 67 | 0.954 | 1.366 | 0.393 | 5.096  | 0.489  | 0.001 |
| 68 | 0.876 | 1.366 | 0.319 | 4.920  | 0.432  | 0.003 |
| 69 | 0.900 | 1.392 | 0.289 | 4.756  | 0.474  | 0.005 |
| 70 | 1.436 | 3.556 | 0.224 | 12.630 | 0.079  | 0.013 |
| 71 | 1.188 | 2.689 | 0.174 | 8.489  | 0.326  | 0.027 |
| 72 | 0.985 | 1.994 | 0.257 | 7.236  | 0.262  | 0.008 |
| 73 | 0.905 | 1.608 | 0.481 | 7.464  | 0.162  | 0.000 |
| 74 | 0.840 | 1.260 | 0.563 | 5.861  | 0.284  | 0.000 |
| 75 | 0.851 | 1.310 | 0.552 | 6.100  | 0.268  | 0.000 |
| 76 | 0.789 | 1.243 | 0.378 | 4.904  | 0.345  | 0.001 |
| 77 | 0.809 | 1.309 | 0.371 | 5.184  | 0.333  | 0.001 |
| 78 | 1.359 | 3.507 | 0.301 | 14.298 | -0.150 | 0.004 |
| 79 | 1.167 | 2.761 | 0.195 | 9.231  | 0.229  | 0.020 |
| 80 | 0.850 | 1.896 | 0.213 | 6.556  | 0.179  | 0.015 |
| 81 | 0.855 | 1.560 | 0.506 | 7.501  | 0.107  | 0.000 |
| 82 | 0.760 | 1.217 | 0.604 | 6.128  | 0.174  | 0.000 |
| 83 | 0.763 | 1.225 | 0.478 | 5.472  | 0.252  | 0.000 |
| 84 | 0.761 | 1.295 | 0.360 | 5.194  | 0.284  | 0.001 |
| 85 | 1.475 | 3.957 | 0.310 | 16.400 | -0.263 | 0.003 |

|     |       |       |       |        |        |       |
|-----|-------|-------|-------|--------|--------|-------|
| 86  | 1.292 | 3.259 | 0.236 | 11.893 | 0.027  | 0.011 |
| 87  | 0.847 | 1.841 | 0.295 | 7.225  | 0.121  | 0.004 |
| 88  | 0.787 | 1.442 | 0.472 | 6.741  | 0.131  | 0.000 |
| 89  | 0.727 | 1.198 | 0.660 | 6.434  | 0.101  | 0.000 |
| 90  | 0.705 | 1.156 | 0.601 | 5.909  | 0.143  | 0.000 |
| 91  | 1.389 | 3.818 | 0.290 | 15.440 | -0.229 | 0.005 |
| 92  | 1.222 | 2.853 | 0.283 | 11.136 | 0.073  | 0.005 |
| 93  | 0.907 | 1.845 | 0.312 | 7.299  | 0.183  | 0.003 |
| 94  | 0.785 | 1.450 | 0.547 | 7.316  | 0.057  | 0.000 |
| 95  | 0.718 | 1.227 | 0.730 | 7.025  | 0.023  | 0.000 |
| 96  | 1.234 | 3.149 | 0.286 | 12.563 | -0.113 | 0.005 |
| 97  | 1.134 | 2.629 | 0.263 | 9.976  | 0.093  | 0.007 |
| 98  | 0.844 | 1.702 | 0.307 | 6.658  | 0.194  | 0.004 |
| 99  | 0.778 | 1.470 | 0.544 | 7.438  | 0.041  | 0.000 |
| 100 | 1.266 | 3.177 | 0.279 | 12.536 | -0.060 | 0.006 |
| 101 | 1.098 | 2.638 | 0.286 | 10.382 | 0.018  | 0.005 |
| 102 | 0.838 | 1.726 | 0.362 | 7.410  | 0.071  | 0.001 |
| 103 | 1.306 | 3.306 | 0.324 | 13.914 | -0.150 | 0.003 |
| 104 | 0.994 | 2.276 | 0.346 | 9.718  | -0.028 | 0.002 |
| 105 | 1.228 | 3.440 | 0.360 | 15.336 | -0.381 | 0.001 |

---

3.3.5. Spruce site statistics

Table S 3.3.5 – Summary of the model statistics (MAE, RMSE,  $R^2_{adj}$ , Slope, Intercept and P-value) for each scenario for the spruce dominated sites. Highlighted in red are the two best performing scenarios.

| Scenario | MAE   | RMSE  | $R^2_{adj}$ | Slope  | Intercept | P-Value |
|----------|-------|-------|-------------|--------|-----------|---------|
| 1        | 2.675 | 2.865 | 0.518       | 0.577  | 2.788     | 0.000   |
| 2        | 2.617 | 3.080 | 0.273       | 0.472  | 2.556     | 0.006   |
| 3        | 2.841 | 3.735 | 0.028       | 0.238  | 2.852     | 0.216   |
| 4        | 2.752 | 3.784 | -0.004      | 0.175  | 2.822     | 0.350   |
| 5        | 2.660 | 3.799 | -0.027      | 0.116  | 2.657     | 0.527   |
| 6        | 2.630 | 3.808 | -0.033      | 0.096  | 2.578     | 0.597   |
| 7        | 2.653 | 3.861 | -0.041      | 0.064  | 2.569     | 0.721   |
| 8        | 2.734 | 3.925 | -0.045      | 0.039  | 2.670     | 0.830   |
| 9        | 2.747 | 3.964 | -0.047      | 0.026  | 2.652     | 0.886   |
| 10       | 2.774 | 4.000 | -0.047      | 0.026  | 2.711     | 0.889   |
| 11       | 2.868 | 4.085 | -0.048      | 0.003  | 2.817     | 0.989   |
| 12       | 2.944 | 4.184 | -0.047      | -0.010 | 2.906     | 0.960   |
| 13       | 2.992 | 4.235 | -0.047      | -0.014 | 2.969     | 0.943   |
| 14       | 3.067 | 4.279 | -0.047      | -0.020 | 3.068     | 0.921   |
| 15       | 2.077 | 2.834 | 0.286       | 0.533  | 1.765     | 0.005   |
| 16       | 1.780 | 2.517 | 0.303       | 0.429  | 1.525     | 0.004   |
| 17       | 1.794 | 2.629 | 0.211       | 0.298  | 1.561     | 0.016   |
| 18       | 1.879 | 2.915 | 0.080       | 0.205  | 1.583     | 0.103   |
| 19       | 1.967 | 3.081 | 0.016       | 0.141  | 1.520     | 0.257   |
| 20       | 1.959 | 3.119 | -0.001      | 0.115  | 1.465     | 0.336   |
| 21       | 1.965 | 3.155 | -0.016      | 0.092  | 1.470     | 0.425   |
| 22       | 1.967 | 3.190 | -0.023      | 0.079  | 1.455     | 0.481   |
| 23       | 1.996 | 3.228 | -0.029      | 0.071  | 1.502     | 0.541   |
| 24       | 2.015 | 3.246 | -0.028      | 0.074  | 1.516     | 0.534   |
| 25       | 2.081 | 3.286 | -0.036      | 0.056  | 1.570     | 0.632   |
| 26       | 2.058 | 3.272 | -0.033      | 0.064  | 1.580     | 0.587   |
| 27       | 2.088 | 3.302 | -0.035      | 0.061  | 1.632     | 0.617   |
| 28       | 1.745 | 2.595 | 0.254       | 0.401  | 1.535     | 0.008   |
| 29       | 1.388 | 2.267 | 0.393       | 0.416  | 0.942     | 0.001   |
| 30       | 1.471 | 2.516 | 0.284       | 0.280  | 0.944     | 0.005   |
| 31       | 1.604 | 2.755 | 0.152       | 0.192  | 0.947     | 0.037   |
| 32       | 1.701 | 2.942 | 0.057       | 0.123  | 0.958     | 0.142   |
| 33       | 1.717 | 2.997 | 0.037       | 0.104  | 0.917     | 0.189   |
| 34       | 1.743 | 3.039 | 0.020       | 0.089  | 0.915     | 0.244   |

|    |       |       |        |       |       |       |
|----|-------|-------|--------|-------|-------|-------|
| 35 | 1.777 | 3.099 | -0.006 | 0.069 | 0.952 | 0.363 |
| 36 | 1.783 | 3.099 | -0.005 | 0.071 | 0.937 | 0.358 |
| 37 | 1.765 | 3.091 | -0.003 | 0.071 | 0.954 | 0.342 |
| 38 | 1.768 | 3.091 | -0.001 | 0.073 | 0.951 | 0.335 |
| 39 | 1.796 | 3.092 | -0.004 | 0.075 | 0.995 | 0.348 |
| 40 | 1.336 | 2.311 | 0.370  | 0.368 | 0.982 | 0.001 |
| 41 | 1.341 | 2.437 | 0.348  | 0.325 | 0.653 | 0.002 |
| 42 | 1.377 | 2.532 | 0.420  | 0.252 | 0.562 | 0.000 |
| 43 | 1.527 | 2.826 | 0.244  | 0.151 | 0.609 | 0.010 |
| 44 | 1.574 | 2.942 | 0.153  | 0.112 | 0.637 | 0.037 |
| 45 | 1.586 | 3.020 | 0.094  | 0.091 | 0.627 | 0.084 |
| 46 | 1.597 | 3.059 | 0.072  | 0.080 | 0.619 | 0.115 |
| 47 | 1.618 | 3.084 | 0.060  | 0.073 | 0.613 | 0.137 |
| 48 | 1.629 | 3.116 | 0.033  | 0.062 | 0.637 | 0.201 |
| 49 | 1.637 | 3.127 | 0.029  | 0.060 | 0.622 | 0.211 |
| 50 | 1.638 | 3.094 | 0.060  | 0.074 | 0.606 | 0.136 |
| 51 | 1.296 | 2.492 | 0.314  | 0.308 | 0.651 | 0.003 |
| 52 | 1.263 | 2.595 | 0.352  | 0.250 | 0.470 | 0.002 |
| 53 | 1.405 | 2.739 | 0.387  | 0.183 | 0.445 | 0.001 |
| 54 | 1.492 | 2.923 | 0.286  | 0.121 | 0.481 | 0.005 |
| 55 | 1.519 | 3.039 | 0.225  | 0.091 | 0.451 | 0.013 |
| 56 | 1.534 | 3.096 | 0.162  | 0.078 | 0.442 | 0.033 |
| 57 | 1.567 | 3.138 | 0.123  | 0.065 | 0.448 | 0.056 |
| 58 | 1.575 | 3.163 | 0.095  | 0.059 | 0.443 | 0.083 |
| 59 | 1.561 | 3.139 | 0.118  | 0.067 | 0.452 | 0.060 |
| 60 | 1.581 | 3.155 | 0.111  | 0.062 | 0.457 | 0.067 |
| 61 | 1.235 | 2.656 | 0.333  | 0.233 | 0.437 | 0.002 |
| 62 | 1.373 | 2.857 | 0.218  | 0.170 | 0.405 | 0.014 |
| 63 | 1.429 | 2.935 | 0.231  | 0.127 | 0.429 | 0.012 |
| 64 | 1.476 | 3.034 | 0.300  | 0.095 | 0.397 | 0.004 |
| 65 | 1.518 | 3.103 | 0.243  | 0.079 | 0.375 | 0.010 |
| 66 | 1.523 | 3.161 | 0.233  | 0.068 | 0.354 | 0.011 |
| 67 | 1.519 | 3.142 | 0.275  | 0.075 | 0.334 | 0.006 |
| 68 | 1.529 | 3.178 | 0.211  | 0.065 | 0.340 | 0.016 |
| 69 | 1.541 | 3.213 | 0.207  | 0.057 | 0.328 | 0.017 |
| 70 | 1.392 | 2.868 | 0.234  | 0.168 | 0.380 | 0.011 |
| 71 | 1.450 | 3.015 | 0.111  | 0.120 | 0.430 | 0.066 |
| 72 | 1.405 | 3.068 | 0.106  | 0.095 | 0.397 | 0.071 |
| 73 | 1.441 | 3.104 | 0.207  | 0.081 | 0.356 | 0.017 |
| 74 | 1.485 | 3.109 | 0.331  | 0.088 | 0.287 | 0.002 |

|            |       |       |       |       |       |       |
|------------|-------|-------|-------|-------|-------|-------|
| <b>75</b>  | 1.497 | 3.166 | 0.377 | 0.077 | 0.260 | 0.001 |
| <b>76</b>  | 1.529 | 3.220 | 0.300 | 0.062 | 0.268 | 0.004 |
| <b>77</b>  | 1.531 | 3.219 | 0.309 | 0.065 | 0.249 | 0.003 |
| <b>78</b>  | 1.464 | 3.031 | 0.092 | 0.115 | 0.447 | 0.086 |
| <b>79</b>  | 1.481 | 3.105 | 0.054 | 0.096 | 0.413 | 0.149 |
| <b>80</b>  | 1.422 | 3.093 | 0.067 | 0.094 | 0.394 | 0.123 |
| <b>81</b>  | 1.422 | 3.091 | 0.194 | 0.097 | 0.289 | 0.020 |
| <b>82</b>  | 1.465 | 3.124 | 0.301 | 0.087 | 0.264 | 0.004 |
| <b>83</b>  | 1.508 | 3.193 | 0.361 | 0.071 | 0.246 | 0.001 |
| <b>84</b>  | 1.539 | 3.229 | 0.327 | 0.063 | 0.234 | 0.003 |
| <b>85</b>  | 1.464 | 3.129 | 0.039 | 0.084 | 0.430 | 0.183 |
| <b>86</b>  | 1.500 | 3.162 | 0.017 | 0.084 | 0.429 | 0.255 |
| <b>87</b>  | 1.439 | 3.105 | 0.066 | 0.103 | 0.357 | 0.125 |
| <b>88</b>  | 1.441 | 3.119 | 0.152 | 0.088 | 0.303 | 0.037 |
| <b>89</b>  | 1.488 | 3.162 | 0.282 | 0.079 | 0.247 | 0.005 |
| <b>90</b>  | 1.523 | 3.217 | 0.337 | 0.067 | 0.226 | 0.002 |
| <b>91</b>  | 1.506 | 3.157 | 0.020 | 0.086 | 0.427 | 0.241 |
| <b>92</b>  | 1.483 | 3.141 | 0.035 | 0.092 | 0.394 | 0.196 |
| <b>93</b>  | 1.449 | 3.106 | 0.070 | 0.102 | 0.352 | 0.118 |
| <b>94</b>  | 1.429 | 3.121 | 0.148 | 0.090 | 0.289 | 0.040 |
| <b>95</b>  | 1.500 | 3.186 | 0.246 | 0.074 | 0.240 | 0.009 |
| <b>96</b>  | 1.471 | 3.126 | 0.040 | 0.095 | 0.392 | 0.182 |
| <b>97</b>  | 1.480 | 3.109 | 0.044 | 0.102 | 0.390 | 0.170 |
| <b>98</b>  | 1.426 | 3.102 | 0.085 | 0.101 | 0.326 | 0.096 |
| <b>99</b>  | 1.454 | 3.164 | 0.112 | 0.078 | 0.286 | 0.065 |
| <b>100</b> | 1.480 | 3.128 | 0.043 | 0.100 | 0.381 | 0.173 |
| <b>101</b> | 1.470 | 3.127 | 0.055 | 0.094 | 0.363 | 0.146 |
| <b>102</b> | 1.439 | 3.156 | 0.055 | 0.086 | 0.327 | 0.145 |
| <b>103</b> | 1.458 | 3.123 | 0.061 | 0.094 | 0.358 | 0.134 |
| <b>104</b> | 1.450 | 3.156 | 0.044 | 0.086 | 0.347 | 0.170 |
| <b>105</b> | 1.471 | 3.168 | 0.036 | 0.079 | 0.362 | 0.191 |

---

3.3.6. Scenario-specific model performance for the spruce sites with no bark beetle submodel (ForClim v4.1)

165 Table S 3.3.6 – Summary of model statistics (MAE, RMSE,  $R^2_{adj}$ , Slope, Intercept and P-value) for each scenario for the spruce-dominated sites. In this case, the bark beetle routine was switched off. Highlighted in red are the two best soil moisture scenarios selected as best ones in the bark beetle simulations.

| Scenario | MAE   | RMSE  | $R^2_{adj}$ | Slope  | Intercept | P-Value |
|----------|-------|-------|-------------|--------|-----------|---------|
| 1        | 1.472 | 2.423 | 0.321       | 0.345  | 0.816     | 0.003   |
| 2        | 1.691 | 2.814 | 0.093       | 0.142  | 1.133     | 0.085   |
| 3        | 2.075 | 3.125 | -0.010      | 0.101  | 1.752     | 0.384   |
| 4        | 2.173 | 3.300 | -0.028      | 0.084  | 1.819     | 0.530   |
| 5        | 2.190 | 3.429 | -0.043      | 0.042  | 1.767     | 0.751   |
| 6        | 2.216 | 3.523 | -0.048      | 0.000  | 1.745     | 0.998   |
| 7        | 2.241 | 3.553 | -0.047      | 0.011  | 1.797     | 0.938   |
| 8        | 2.311 | 3.650 | -0.047      | -0.014 | 1.862     | 0.920   |
| 9        | 2.339 | 3.664 | -0.046      | -0.025 | 1.866     | 0.860   |
| 10       | 2.325 | 3.662 | -0.046      | -0.022 | 1.906     | 0.874   |
| 11       | 2.363 | 3.700 | -0.046      | -0.026 | 1.942     | 0.859   |
| 12       | 2.389 | 3.715 | -0.047      | -0.017 | 2.019     | 0.912   |
| 13       | 2.456 | 3.813 | -0.044      | -0.041 | 2.064     | 0.788   |
| 14       | 2.486 | 3.868 | -0.043      | -0.050 | 2.110     | 0.752   |
| 15       | 1.728 | 3.261 | -0.015      | 0.109  | 0.955     | 0.422   |
| 16       | 1.692 | 2.831 | 0.090       | 0.161  | 1.047     | 0.089   |
| 17       | 1.626 | 2.836 | 0.104       | 0.168  | 0.970     | 0.073   |
| 18       | 1.754 | 2.986 | 0.031       | 0.115  | 1.039     | 0.207   |
| 19       | 1.785 | 3.117 | -0.016      | 0.065  | 1.004     | 0.424   |
| 20       | 1.816 | 3.184 | -0.035      | 0.039  | 1.025     | 0.621   |
| 21       | 1.823 | 3.222 | -0.039      | 0.032  | 1.005     | 0.685   |
| 22       | 1.836 | 3.247 | -0.043      | 0.024  | 1.000     | 0.756   |
| 23       | 1.854 | 3.234 | -0.042      | 0.027  | 1.034     | 0.736   |
| 24       | 1.907 | 3.320 | -0.047      | 0.007  | 1.093     | 0.930   |
| 25       | 1.912 | 3.322 | -0.047      | 0.006  | 1.082     | 0.948   |
| 26       | 1.946 | 3.344 | -0.048      | -0.002 | 1.145     | 0.984   |
| 27       | 1.937 | 3.345 | -0.048      | -0.002 | 1.161     | 0.981   |
| 28       | 1.820 | 3.189 | -0.008      | 0.125  | 1.220     | 0.374   |
| 29       | 1.511 | 2.700 | 0.255       | 0.214  | 0.580     | 0.008   |
| 30       | 1.506 | 2.794 | 0.229       | 0.174  | 0.585     | 0.012   |
| 31       | 1.553 | 2.957 | 0.123       | 0.120  | 0.610     | 0.056   |
| 32       | 1.589 | 3.089 | 0.047       | 0.075  | 0.609     | 0.164   |
| 33       | 1.627 | 3.188 | -0.004      | 0.047  | 0.617     | 0.350   |



|    |       |       |        |       |       |       |
|----|-------|-------|--------|-------|-------|-------|
| 34 | 1.604 | 3.176 | 0.012  | 0.053 | 0.575 | 0.273 |
| 35 | 1.649 | 3.224 | -0.023 | 0.035 | 0.626 | 0.483 |
| 36 | 1.623 | 3.208 | -0.013 | 0.040 | 0.609 | 0.407 |
| 37 | 1.657 | 3.258 | -0.039 | 0.020 | 0.654 | 0.674 |
| 38 | 1.664 | 3.248 | -0.030 | 0.031 | 0.642 | 0.554 |
| 39 | 1.682 | 3.263 | -0.038 | 0.022 | 0.680 | 0.671 |
| 40 | 1.495 | 2.648 | 0.275  | 0.232 | 0.576 | 0.006 |
| 41 | 1.420 | 2.712 | 0.325  | 0.213 | 0.393 | 0.003 |
| 42 | 1.447 | 2.863 | 0.306  | 0.154 | 0.415 | 0.004 |
| 43 | 1.491 | 3.033 | 0.206  | 0.101 | 0.423 | 0.017 |
| 44 | 1.545 | 3.157 | 0.095  | 0.065 | 0.424 | 0.083 |
| 45 | 1.555 | 3.200 | 0.065  | 0.053 | 0.424 | 0.127 |
| 46 | 1.541 | 3.234 | 0.053  | 0.046 | 0.396 | 0.149 |
| 47 | 1.541 | 3.224 | 0.056  | 0.045 | 0.411 | 0.143 |
| 48 | 1.548 | 3.222 | 0.038  | 0.040 | 0.428 | 0.187 |
| 49 | 1.543 | 3.231 | 0.032  | 0.038 | 0.421 | 0.203 |
| 50 | 1.570 | 3.267 | -0.001 | 0.030 | 0.435 | 0.333 |
| 51 | 1.400 | 2.712 | 0.296  | 0.217 | 0.377 | 0.004 |
| 52 | 1.381 | 2.851 | 0.178  | 0.179 | 0.409 | 0.026 |
| 53 | 1.391 | 2.947 | 0.235  | 0.127 | 0.374 | 0.011 |
| 54 | 1.480 | 3.119 | 0.188  | 0.077 | 0.365 | 0.022 |
| 55 | 1.532 | 3.191 | 0.137  | 0.061 | 0.346 | 0.046 |
| 56 | 1.557 | 3.271 | 0.077  | 0.041 | 0.324 | 0.107 |
| 57 | 1.543 | 3.262 | 0.112  | 0.046 | 0.310 | 0.066 |
| 58 | 1.562 | 3.298 | 0.100  | 0.038 | 0.290 | 0.077 |
| 59 | 1.566 | 3.301 | 0.088  | 0.037 | 0.307 | 0.092 |
| 60 | 1.579 | 3.320 | 0.073  | 0.033 | 0.291 | 0.113 |
| 61 | 1.365 | 2.888 | 0.204  | 0.172 | 0.334 | 0.018 |
| 62 | 1.444 | 3.016 | 0.096  | 0.127 | 0.401 | 0.082 |
| 63 | 1.422 | 3.115 | 0.067  | 0.085 | 0.390 | 0.124 |
| 64 | 1.502 | 3.192 | 0.108  | 0.060 | 0.329 | 0.069 |
| 65 | 1.539 | 3.265 | 0.093  | 0.046 | 0.278 | 0.086 |
| 66 | 1.549 | 3.291 | 0.133  | 0.042 | 0.261 | 0.049 |
| 67 | 1.576 | 3.305 | 0.208  | 0.043 | 0.228 | 0.017 |
| 68 | 1.577 | 3.340 | 0.136  | 0.032 | 0.237 | 0.047 |
| 69 | 1.586 | 3.327 | 0.175  | 0.039 | 0.223 | 0.027 |
| 70 | 1.443 | 3.018 | 0.099  | 0.125 | 0.399 | 0.078 |
| 71 | 1.492 | 3.182 | 0.009  | 0.072 | 0.425 | 0.284 |
| 72 | 1.443 | 3.191 | 0.025  | 0.073 | 0.343 | 0.226 |
| 73 | 1.497 | 3.236 | 0.053  | 0.053 | 0.302 | 0.150 |

|            |       |       |        |       |       |       |
|------------|-------|-------|--------|-------|-------|-------|
| <b>74</b>  | 1.537 | 3.289 | 0.122  | 0.045 | 0.237 | 0.057 |
| <b>75</b>  | 1.566 | 3.313 | 0.204  | 0.044 | 0.197 | 0.018 |
| <b>76</b>  | 1.596 | 3.333 | 0.277  | 0.042 | 0.171 | 0.006 |
| <b>77</b>  | 1.595 | 3.344 | 0.276  | 0.038 | 0.187 | 0.006 |
| <b>78</b>  | 1.519 | 3.208 | -0.001 | 0.067 | 0.426 | 0.334 |
| <b>79</b>  | 1.510 | 3.212 | 0.007  | 0.072 | 0.370 | 0.293 |
| <b>80</b>  | 1.467 | 3.215 | 0.009  | 0.069 | 0.344 | 0.285 |
| <b>81</b>  | 1.482 | 3.245 | 0.054  | 0.058 | 0.256 | 0.147 |
| <b>82</b>  | 1.544 | 3.297 | 0.149  | 0.048 | 0.198 | 0.039 |
| <b>83</b>  | 1.591 | 3.338 | 0.212  | 0.044 | 0.167 | 0.016 |
| <b>84</b>  | 1.601 | 3.344 | 0.274  | 0.041 | 0.166 | 0.006 |
| <b>85</b>  | 1.501 | 3.216 | 0.003  | 0.068 | 0.376 | 0.315 |
| <b>86</b>  | 1.540 | 3.264 | -0.015 | 0.057 | 0.388 | 0.419 |
| <b>87</b>  | 1.496 | 3.235 | 0.006  | 0.071 | 0.317 | 0.297 |
| <b>88</b>  | 1.504 | 3.272 | 0.055  | 0.053 | 0.230 | 0.146 |
| <b>89</b>  | 1.556 | 3.305 | 0.151  | 0.050 | 0.183 | 0.038 |
| <b>90</b>  | 1.597 | 3.350 | 0.204  | 0.039 | 0.163 | 0.017 |
| <b>91</b>  | 1.531 | 3.262 | -0.015 | 0.056 | 0.387 | 0.419 |
| <b>92</b>  | 1.535 | 3.267 | -0.014 | 0.060 | 0.374 | 0.414 |
| <b>93</b>  | 1.497 | 3.266 | -0.005 | 0.061 | 0.317 | 0.354 |
| <b>94</b>  | 1.522 | 3.301 | 0.030  | 0.046 | 0.232 | 0.209 |
| <b>95</b>  | 1.574 | 3.336 | 0.123  | 0.040 | 0.183 | 0.056 |
| <b>96</b>  | 1.540 | 3.263 | -0.012 | 0.062 | 0.368 | 0.397 |
| <b>97</b>  | 1.534 | 3.230 | -0.004 | 0.072 | 0.372 | 0.353 |
| <b>98</b>  | 1.464 | 3.270 | 0.003  | 0.060 | 0.277 | 0.314 |
| <b>99</b>  | 1.537 | 3.318 | 0.018  | 0.043 | 0.219 | 0.249 |
| <b>100</b> | 1.532 | 3.228 | 0.005  | 0.075 | 0.347 | 0.305 |
| <b>101</b> | 1.480 | 3.240 | 0.009  | 0.068 | 0.300 | 0.284 |
| <b>102</b> | 1.483 | 3.301 | -0.003 | 0.056 | 0.257 | 0.342 |
| <b>103</b> | 1.485 | 3.262 | 0.005  | 0.062 | 0.295 | 0.303 |
| <b>104</b> | 1.474 | 3.258 | 0.008  | 0.068 | 0.272 | 0.292 |
| <b>105</b> | 1.496 | 3.266 | 0.003  | 0.062 | 0.295 | 0.315 |

---

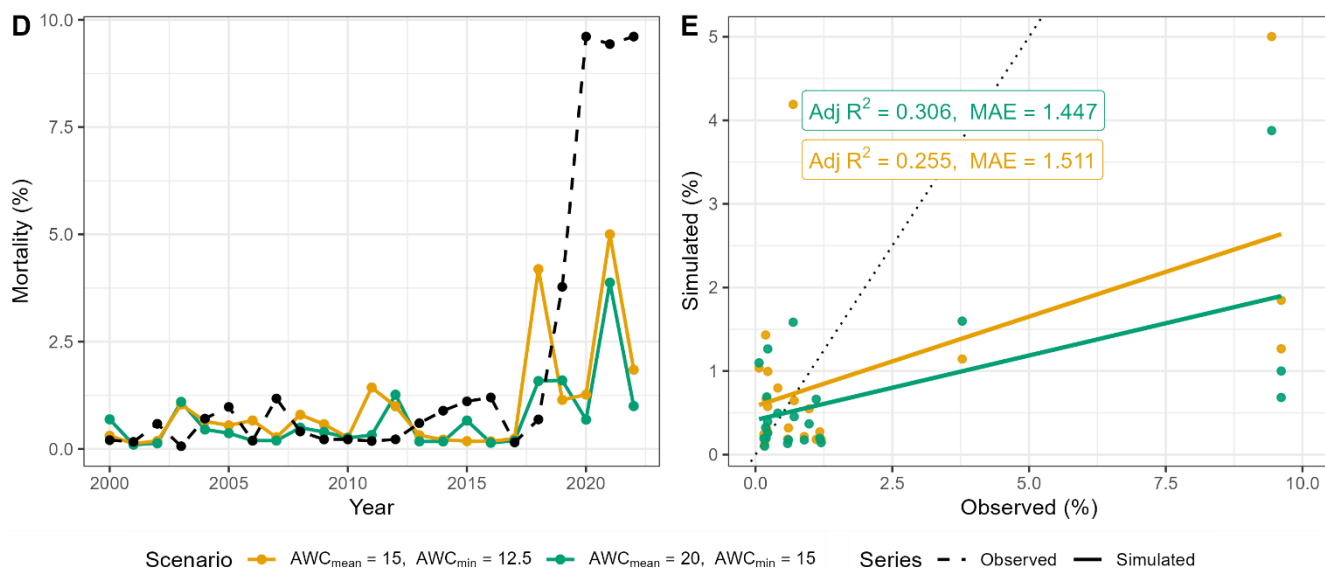

Figure S 3.3.6. – Simulated and observed mortality rate over time averaged across spruce sites and grouped by soil scenario in the absence of the bark beetle model (ForClim v4.1). Only the two best-performing scenarios are shown.

3.3.7. Sensitivity analysis of kDrSc and P<sub>bark</sub> parameters

Table S 3.3.7 - Sensitivity of MAE to PIC parameters. Central-difference slopes of MAE per 1% parameter change for the drought-inciting scaling factor (kDrSc) and baseline outbreak probability (P<sub>bark</sub>) in scenarios 29 and 42. Slopes are averaged over the ±10% and ±20% perturbation pairs; 95% bootstrap confidence intervals are from resampling years. Negative slopes indicate that increasing the parameter reduces MAE (improved fit). Larger |slope| denotes greater sensitivity.

| Scenario | Factor            | Direction      | Slope (ΔMAE per 1%) | 95% CI                | Slope    |
|----------|-------------------|----------------|---------------------|-----------------------|----------|
| 29       | kDrSc             | ↓ MAE (better) | -0.004421           | (-0.034152, 0.027718) | 0.004421 |
| 29       | P <sub>bark</sub> | ↑ MAE (worse)  | 0.000431            | (-0.032952, 0.031187) | 0.000431 |
| 42       | kDrSc             | ↓ MAE (better) | -0.000769           | (-0.037759, 0.033127) | 0.000769 |
| 42       | P <sub>bark</sub> | ↑ MAE (worse)  | 0.000005            | (-0.035107, 0.035660) | 0.000005 |

#### 4.1. | Overview

ForClim is a forest gap model (Botkin et al., 1972) originally designed to capture the long-term (i.e., decades to centuries) growth, mortality and regeneration of trees in temperate forests of central Europe and account for climate change effects on forest dynamics (Bugmann, 1994, 1996). In gap models, forest dynamics are simulated on small areas ('patches'), usually with a size of 400-1000 m<sup>2</sup>, each representing one out of many stochastic realizations that are spatially independent of each other. The soil moisture balance is calculated using a monolayer "bucket" model that stores all incident water until its capacity ("bucket size", kBS) is reached, which corresponds to AWC. The bucket model has a fixed field capacity, beyond which soil moisture cannot increase. This simplification facilitates computations but limits the representation of hydrological processes such as percolation and soil moisture variability above field capacity. For details, cf. Bugmann and Cramer (1998); Bugmann and Solomon (2000).

This bucket model is directly linked to plant dynamics, with tree growth being determined as a species-specific potential (i.e., under optimum conditions) that is reduced via a growth-reduction factor (*GRF*, cf. *Eq. S4.1*) accounting for light availability (*ALGF*), crown condition (*CLGF*), temperature (*DDGF*), nitrogen (*SNGF*) and soil moisture (*SMGF*; for details cf. Bugmann & Solomon, 2000; Huber et al., 2020):

$$GRF = \sqrt{CLGF \cdot SNGF \cdot ALGF \cdot SMGF \cdot DDGF} \quad \text{Eq. S4.1}$$

*SMGF* depends on the annual drought index (*gDr*) and a species-specific drought tolerance parameter (*kDrTol*). *gDr* is computed at a monthly time step for deciduous species considering the length of the growing season in temperate regions (i.e., April – October), and across the year for evergreen species, provided temperatures are high enough (cf. Bugmann and Cramer, 1998). In this version of ForClim (v4.0.1; Huber et al., 2020), tree mortality from stress is assumed to occur when diameter growth falls below a specific stem diameter increment or a fraction of the maximum increment for several years (Solomon and Shugart, 1989). Thus, *predisposing* stress is assumed to increase the mortality rate, but there is no consideration of *inciting* stress (cf. the PIC scheme).

## 4.2. | Integrating predisposing and inciting stress factors

To enhance the response of tree growth to environmental extremes (temperature and soil moisture dynamics), we modified the original growth reduction formulation (Huber et al. 2020) by applying Liebig's “law of the minimum” for the temperature ( $DDGF$ ) and soil moisture ( $SMGF$ ) growth factors (Eq. S4.2; cf. Liebig et al., 1842), rather than multiplying them:

$$GRF = \sqrt{CLGF \cdot SNGF \cdot ALGF} \cdot \min(SMGF, DDGF) \quad \text{Eq. S4.2}$$

The underlying rationale is that in temperate and boreal regions, conditions are typically either dry *or* cold, but not dry *and* cold (cf. Bugmann, 1996). To preserve the species-specific response to environmental stress although the level of GRF is changing due to the use of *Eq. S4.2* instead of *Eq. S4.1*, we had to re-estimate a temperature-related species-specific parameter, and we also modified the dynamic formulation of site index, which reflects the response of maximum tree height to temperature and drought and their changes over time. All past formulations of  $GRF$  together with a sensitivity analysis.

To disentangle predisposing and inciting factors leading to drought-related mortality, we identified short-term (within a year) and long-term (multi-year) stressors linked to drought duration and intensity as well as carbon starvation, as explained below.

First, we accounted for the effect of long-lasting droughts by a *predisposing factor* using a drought memory term ( $DrM$ ; Wang et al., 2012, *Eq. S4.3*):

$$DrM = \begin{cases} DrM + 1, & gDr > kDrTh \cdot kDrTol_s \\ 0, & else \end{cases} \quad \text{Eq. S 4.3}$$

This formulation counts all contiguous years in which drought intensity, represented by the ForClim drought index ( $gDr$ ), exceeds a fraction ( $kDrTh$ ) of the species-specific drought tolerance ( $kDrTol_s$ ). In this manner, we account for the species-specific resistance to multi-annual drought occurrence. To be consistent, we also modified the “slow growth” factor  $SGr$  to better mimic the impact of carbon reserves on mortality risk.

Second, to deal with inciting factors we defined drought duration within any given year ( $gDrD$ , *Eq. S4.4*) as the ratio of the number of dry months relative to the total number of months  $m$  of the growing period (for

deciduous species,  $m_{gp}$ ; annual for evergreen species,  $m_{an}$ ). The algorithm selects those months in which the average temperature ( $T_m$ ) is above a threshold  $kJ$  (5.5 °C) while water supply (i.e., transpiration,  $gE_m$ , cm) relative to water demand from the soil ( $gD_m$ , cm) is below a threshold  $kEg$ ; i.e.,  $gE_m/gD_m < kEg$ ; and  $SM_s < kBS$ ; note that the full documentation of all soil moisture variables can be found in SM D10). The term  $\mathbb{1}$  in Eq. S4.4 represents an indicator function that equals 1 if the condition is yes for a given month, and 0 otherwise.

$$gDrD_{gp} = \frac{1}{m_{gp}} \sum_{m=4}^{10} \mathbb{1}(T_m \geq kJ) \cdot \mathbb{1}(SM_m < kBS) \cdot \mathbb{1}\left(\frac{gE_m}{gD_m} < kEg\right)$$

**Eq. S4.4**

$$gDrD_{an} = \frac{1}{m_{an}} \sum_{m=1}^{12} \mathbb{1}(T_m \geq kJ) \cdot \mathbb{1}(SM_m < kBS) \cdot \mathbb{1}\left(\frac{gE_m}{gD_m} < kEg\right)$$

Third, under conditions of low demand (i.e., in spring and fall) the index of Eq. 9 would not record any drought, although soil moisture ( $SM_m$ ) may be limiting e.g. for bud break. Thus, we defined two variables to capture limiting soil moisture levels in spring and fall along with a threshold (parameter  $kDu$ ) for the duration of the drought to define an *inciting* factor for drought stress ( $IncFDr$ ; Eq. S4.5).

$$IncFDr = \begin{cases} 1, & (SM_{spring} < kREW_{spring} \cdot kBS) \wedge (SM_{fall} < kREW_{fall} \cdot kBS) \wedge gDrD > kDu \\ 0, & \text{else} \end{cases} \quad \text{Eq. S4.5}$$

This formulation for the water deficit in spring and fall is based on the concept of ‘relative extractable water’ (REW; Breda et al., 1980; Granier et al., 1999); SM D4). Specifically, the spring component of  $IncFDr$  reflects the need of trees to mobilize water for bud break and cell division and elongation, while the fall component reflects the need of accumulating carbon reserves for the subsequent year (cf. REW in Figure 2). The threshold  $kDu$  was set to 0.28, corresponding to two months out of a seven-month growing period ( $2/7 \approx 0.28$ ) for broadleaves, and three to four months out of the whole year ( $3.5/12 \approx 0.29$ ) for evergreen species, provided that winters are warm enough (cf. Hidy et al., 2012, 2021; Merganičová et al., 2024). The seasonal soil moisture levels ( $SM_{fall}$ ,  $SM_{spring}$ ) are calculated for the fall (September to November) and spring (March to May) periods for both evergreen and deciduous species.

Lastly, the overall stress-induced mortality probability ( $gPStr$ ), including carbon memory and integrating predisposing as well as inciting factors, is formulated as follows:

$$gPStr = \begin{cases} kStressP, & SGr > kSGrT \vee (DrM > kSGrT \wedge IncFDr = 1) \\ 0, & else \end{cases} \quad \text{Eq. S4.6}$$

where  $kStressP$  is the stress-induced enhanced mortality probability,  $SGr$  is the counter for slow-growth years, and  $kSGrT$  indicates the number of stress years that are tolerated until mortality probability may rise, provided that there is an inciting factor (Peltier et al., 2023). The first term of Eq. S4.6 ( $SGr$  condition) captures the probability that a tree may die due to slow growth induced by whatever cause (e.g., insufficient light), whereas the second term ( $DrM$  and  $IncFDr$  conditions) reflects that a string of dry years (predisposing factors) can enhance mortality under a particularly prolonged summer drought when coupled to early- and/or late-season soil moisture depletion (inciting factor).

The ensemble of these features gives rise to ForClim v4.1. Since contributing factors (Manion, 1981), 1981) such as insect damage are currently not included, we refer to the concept underlying ForClim v4.1 as the “PI framework”, rather than PIC.

All species- and process-specific parameters used in the new drought mortality formulation were set based on literature values, ecological reasoning, or consistently with values used in previous ForClim versions. Importantly, no parameters were calibrated against the empirical data. This ensures that the simulation outcomes reflect the structural behavior of the new formulation rather than fitting to observations. Further material can be found in the manuscript Marano et al. 2025 currently under revision at *Ecosphere*.

## References

- Anselin, L.: Local Indicators of Spatial Association—LISA, *Geographical Analysis*, 27, 93–115, <https://doi.org/10.1111/j.1538-4632.1995.tb00338.x>, 1995.
- Botkin, D. B., Janak, J. F., and Wallis, J. R.: Some Ecological Consequences of a Computer Model of Forest Growth, *The Journal of Ecology*, 60, 849–849, <https://doi.org/10.2307/2258570>, 1972.
- Breda, N., Huc, R., Granier, A., and Dreyer, E.: Temperate forest trees and stands under severe drought: a review of ecophysiological responses, adaptation processes and long-term consequences Nathalie, 28, 389–390, [https://doi.org/10.1016/s0034-5288\(18\)32731-0](https://doi.org/10.1016/s0034-5288(18)32731-0), 1980.
- Bugmann, H.: On the Ecology of Mountainous Forests in a Changing Climate: A Simulation Study, Dissertation, ETH Zurich, 252 pp., 1994.



- Bugmann, H. and Cramer, W.: Improving the behaviour of forest gap models along drought gradients, *Forest Ecology and Management*, 103, 247–263, [https://doi.org/10.1016/S0378-1127\(97\)00217-X](https://doi.org/10.1016/S0378-1127(97)00217-X), 1998.
- Bugmann, H. K. M.: A Simplified Forest Model to Study Species Composition Along Climate Gradients, *Ecology*, 77, 2055–2074, <https://doi.org/10.2307/2265700>, 1996.
- Bugmann, H. K. M. and Solomon, A. M.: Explaining forest composition and biomass across multiple biogeographical regions, *Ecological Applications*, 10, 95–114, [https://doi.org/10.1890/1051-0761\(2000\)010\[0095:EFCABA\]2.0.CO;2](https://doi.org/10.1890/1051-0761(2000)010[0095:EFCABA]2.0.CO;2), 2000.
- Granier, A., Bréda, N., Biron, P., and Villetle, S.: A lumped water balance model to evaluate duration and intensity of drought constraints in forest stands, *Ecological Modelling*, 116, 269–283, [https://doi.org/10.1016/S0304-3800\(98\)00205-1](https://doi.org/10.1016/S0304-3800(98)00205-1), 1999.
- Hidy, D., Barcza, Z., Haszpra, L., Churkina, G., Pintér, K., and Nagy, Z.: Development of the Biome-BGC model for simulation of managed herbaceous ecosystems, *Ecological Modelling*, 226, 99–119, <https://doi.org/10.1016/j.ecolmodel.2011.11.008>, 2012.
- Hidy, D., Barcza, Z., Hollós, R., Thornton, P. E., Running, S. W., and Fodor, N.: User's Guide for Biome-BGCMuSo 6.1, 2021.
- Huber, N., Bugmann, H., and Lafond, V.: Capturing ecological processes in dynamic forest models: why there is no silver bullet to cope with complexity, *Ecosphere*, 11, <https://doi.org/10.1002/ecs2.3109>, 2020.
- Liebig, J., Playfair, L. P., and Webster, J. W.: Chemistry in its application to agriculture and physiology, J. Owen, Cambridge, <https://doi.org/10.5962/bhl.title.30425>, 1842.
- Manion, P. D.: Tree disease concepts, Prentice-Hall, Inc., 1981.
- Merganičová, K., Merganič, J., Dobor, L., Hollós, R., Barcza, Z., Hidy, D., Sitková, Z., Pavlenda, P., Marjanovic, H., Kurjak, D., Bošel'a, M., Bitunjac, D., Ostrogović Sever, M. Z., Novák, J., Fleischer, P., and Hlásny, T.: The biogeochemical model Biome-BGCMuSo v6.2 provides plausible and accurate simulations of the carbon cycle in central European beech forests, *Geosci. Model Dev.*, 17, 7317–7346, <https://doi.org/10.5194/gmd-17-7317-2024>, 2024.
- Moran, P. A. P.: Notes on continuous stochastic phenomena, *Biometrika*, Volume 37, 17–23, <https://doi.org/10.1093/biomet/37.1-2.17>, 1950.
- Peltier, D. M. P., Carbone, M. S., McIntire, C. D., Robertson, N., Thompson, R. A., Malone, S., LeMoine, J., Richardson, A. D., McDowell, N. G., Adams, H. D., Pockman, W. T., and Trowbridge, A. M.: Carbon starvation following a decade of experimental drought consumes old reserves in *Pinus edulis*, *New Phytologist*, <https://doi.org/10.1111/nph.19119>, 2023.
- Solomon, A. M. and Shugart, H. H.: Vegetation dynamics and Global change, <https://doi.org/10.1017/CBO9781107415324.004>, 1989.

Wang, W., Peng, C., Kneeshaw, D. D., Larocque, G. R., and Luo, Z.: Drought-induced tree mortality: Ecological consequences, causes, and modeling, *Environmental Reviews*, 20, 109–121, <https://doi.org/10.1139/a2012-004>, 2012.
