# Supplementary material for: Simulating the recent drought-induced mortality of European beech (Fagus sylvatica L.) and Norway spruce (Picea abies L.) in German forests
Source: Copernicus journal article supplement (doi:10.5194/egusphere-2025-1534), 2025-05-26
Supplement: Supplementary file 3 [file MaranoG_etal_SupplementaryMaterial_1.pdf › MaranoG_etal_SupplementaryMaterials/MaranoG_etal_SupplementaryMaterial_1.pdf]

# Simulating the recent drought-induced mortality of European beech (*Fagus sylvatica* L.) and Norway spruce (*Picea abies* L.) in German forests

Gina Marano<sup>1</sup>, Ulrike Hiltner<sup>1</sup>, Nikolai Knapp<sup>2</sup>, Harald Bugmann<sup>1</sup>

<sup>1</sup> Forest Ecology, Institute of Terrestrial Ecosystems, Department of Environmental Systems Science, ETH Zurich, 8092 Zürich, Switzerland

<sup>2</sup> Thünen Institute of Forest Ecosystems, 16225 Eberswalde, Germany

Correspondence to: Gina Marano ([gina.marano@usys.ethz.ch](mailto:gina.marano@usys.ethz.ch))

## Supplementary Material 1

### SM 1 | Climate data

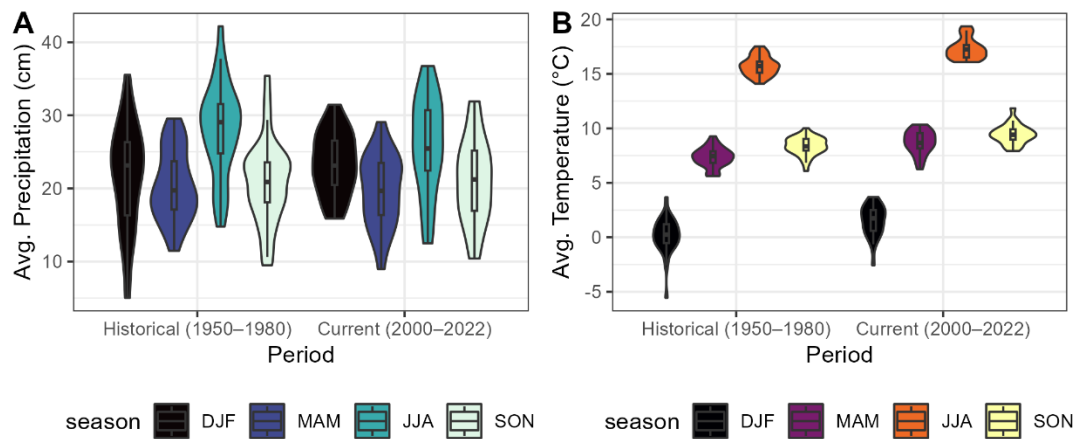

Figure S 1.1– Means of climatic variables (precipitation (A), temperature (B)) for the historical period (1950-1980) and the current climate period (2000-2022) averaged across the European beech dominated sites.

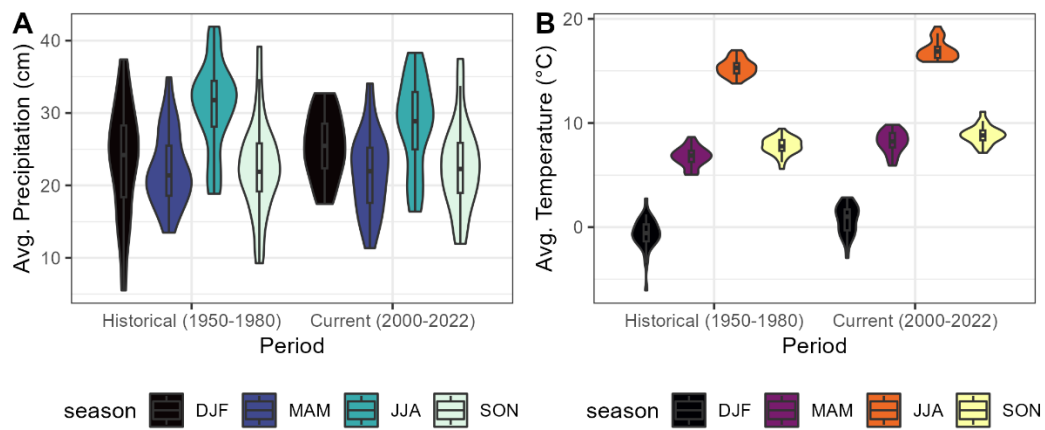

*Figure S 1.2* Means of climatic variables (precipitation (A), temperature (B)) for the historical period (1950-1980) and the current climate period (2000-2022) averaged across the Norway spruce dominated sites.

2.1 Maps of Available Water Capacity

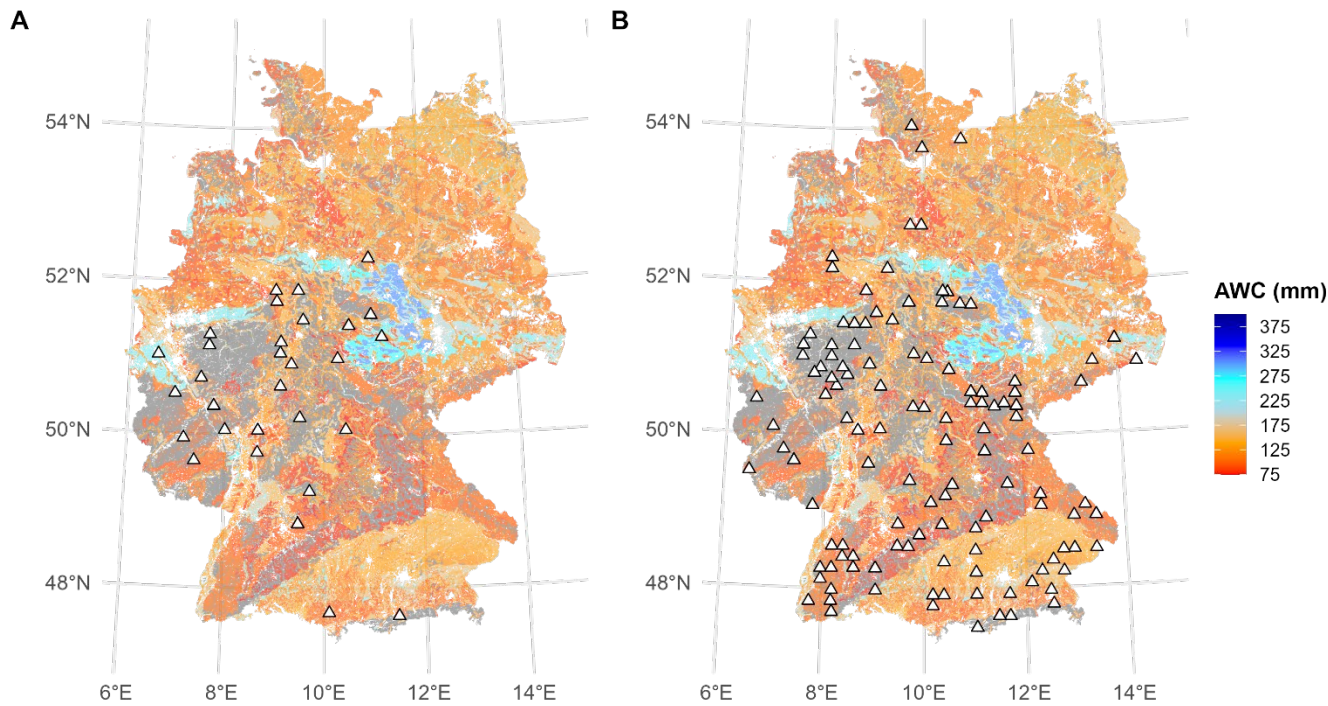

Figure S 2.1.1: Available Water Capacity (AWC, mm, source: BGD) maps and overlaid ICP-Level I (WZE) plots dominated by European beech (A) and Norway spruce (B).

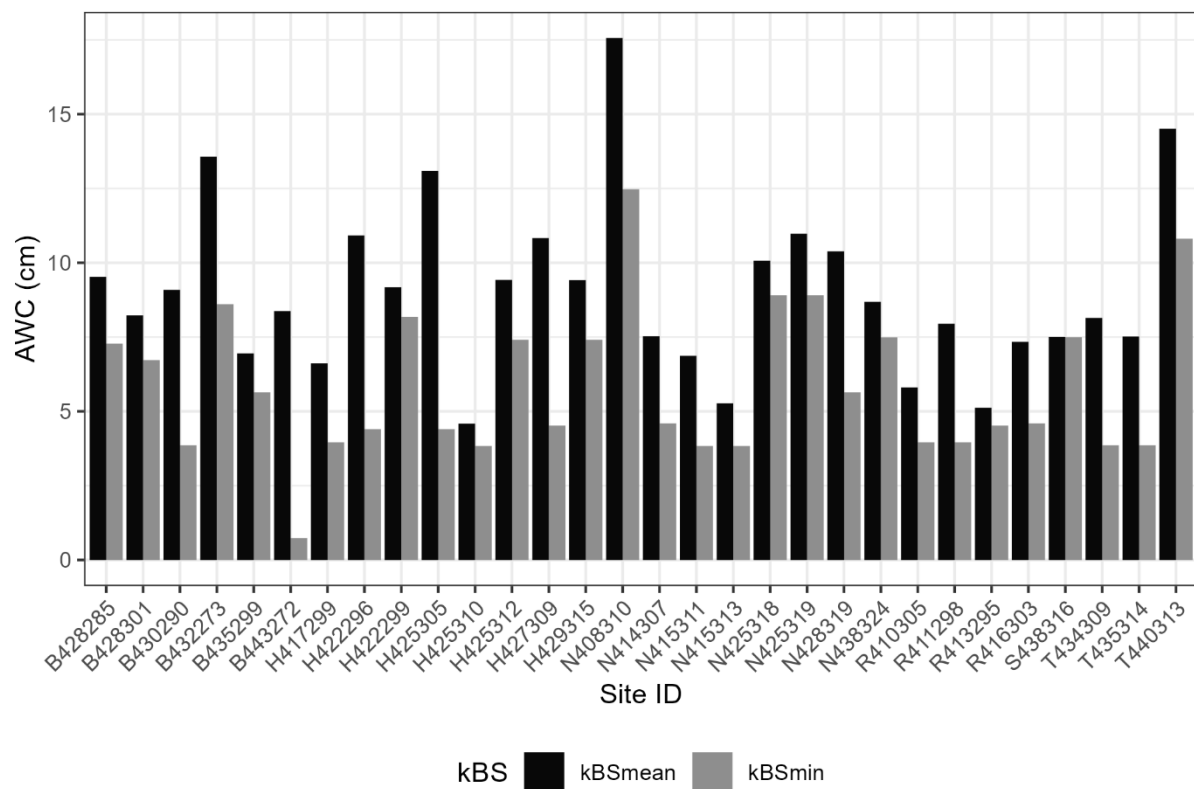

Figure S 2.1.2 – AWC values (cm, mean and minimum) extracted from the BGR map across the ICP-Level I beech dominated sites.

10 *Table S 2.1* – Soil moisture scenarios defined according to  $kBS_{min}$  and  $kBS_{mean}$ . The heterogeneity of each scenario is expressed via the sigma values ( $\sigma$ ) of the lognormal distribution.

| Scenario | $kBS_{min}$ | $kBS_{mean}$ | $\sigma$ |
|----------|-------------|--------------|----------|
| 1        | 7.5         | 7.5          | 0        |
| 2        | 7.5         | 10           | 0.287    |
| 3        | 7.5         | 12.5         | 0.510    |
| 4        | 7.5         | 15           | 0.693    |
| 5        | 7.5         | 17.5         | 0.847    |
| 6        | 7.5         | 20           | 0.980    |
| 7        | 7.5         | 22.5         | 1.098    |
| 8        | 7.5         | 25           | 1.203    |
| 9        | 7.5         | 27.5         | 1.299    |
| 10       | 7.5         | 30           | 1.386    |
| 11       | 7.5         | 32.5         | 1.466    |
| 12       | 7.5         | 35           | 1.540    |
| 13       | 7.5         | 37.5         | 1.609    |
| 14       | 7.5         | 40           | 1.673    |
| 15       | 10          | 10           | 0        |
| 16       | 10          | 12.5         | 0.223    |
| 17       | 10          | 15           | 0.405    |
| 18       | 10          | 17.5         | 0.559    |
| 19       | 10          | 20           | 0.693    |
| 20       | 10          | 22.5         | 0.810    |
| 21       | 10          | 25           | 0.916    |
| 22       | 10          | 27.5         | 1.011    |
| 23       | 10          | 30           | 1.098    |
| 24       | 10          | 32.5         | 1.178    |
| 25       | 10          | 35           | 1.252    |
| 26       | 10          | 37.5         | 1.321    |
| 27       | 10          | 40           | 1.386    |
| 28       | 12.5        | 12.5         | 0        |
| 29       | 12.5        | 15           | 0.182    |
| 30       | 12.5        | 17.5         | 0.336    |
| 31       | 12.5        | 20           | 0.470    |
| 32       | 12.5        | 22.5         | 0.587    |
| 33       | 12.5        | 25           | 0.693    |
| 34       | 12.5        | 27.5         | 0.788    |
| 35       | 12.5        | 30           | 0.875    |
| 36       | 12.5        | 32.5         | 0.955    |
| 37       | 12.5        | 35           | 1.029    |

|    |      |      |       |
|----|------|------|-------|
| 38 | 12.5 | 37.5 | 1.098 |
| 39 | 12.5 | 40   | 1.163 |
| 40 | 15   | 15   | 0     |
| 41 | 15   | 17.5 | 0.154 |
| 42 | 15   | 20   | 0.287 |
| 43 | 15   | 22.5 | 0.405 |
| 44 | 15   | 25   | 0.510 |
| 45 | 15   | 27.5 | 0.606 |
| 46 | 15   | 30   | 0.693 |
| 47 | 15   | 32.5 | 0.773 |
| 48 | 15   | 35   | 0.847 |
| 49 | 15   | 37.5 | 0.916 |
| 50 | 15   | 40   | 0.980 |
| 51 | 17.5 | 17.5 | 0     |
| 52 | 17.5 | 20   | 0.133 |
| 53 | 17.5 | 22.5 | 0.251 |
| 54 | 17.5 | 25   | 0.356 |
| 55 | 17.5 | 27.5 | 0.451 |
| 56 | 17.5 | 30   | 0.538 |
| 57 | 17.5 | 32.5 | 0.619 |
| 58 | 17.5 | 35   | 0.693 |
| 59 | 17.5 | 37.5 | 0.762 |
| 60 | 17.5 | 40   | 0.826 |
| 61 | 20   | 20   | 0     |
| 62 | 20   | 22.5 | 0.117 |
| 63 | 20   | 25   | 0.223 |
| 64 | 20   | 27.5 | 0.318 |
| 65 | 20   | 30   | 0.405 |
| 66 | 20   | 32.5 | 0.485 |
| 67 | 20   | 35   | 0.559 |
| 68 | 20   | 37.5 | 0.628 |
| 69 | 20   | 40   | 0.693 |
| 70 | 22.5 | 22.5 | 0     |
| 71 | 22.5 | 25   | 0.105 |
| 72 | 22.5 | 27.5 | 0.200 |
| 73 | 22.5 | 30   | 0.287 |
| 74 | 22.5 | 32.5 | 0.367 |
| 75 | 22.5 | 35   | 0.441 |
| 76 | 22.5 | 37.5 | 0.510 |
| 77 | 22.5 | 40   | 0.575 |

|     |      |      |       |
|-----|------|------|-------|
| 78  | 25   | 25   | 0     |
| 79  | 25   | 27.5 | 0.095 |
| 80  | 25   | 30   | 0.182 |
| 81  | 25   | 32.5 | 0.262 |
| 82  | 25   | 35   | 0.336 |
| 83  | 25   | 37.5 | 0.405 |
| 84  | 25   | 40   | 0.470 |
| 85  | 27.5 | 27.5 | 0     |
| 86  | 27.5 | 30   | 0.087 |
| 87  | 27.5 | 32.5 | 0.167 |
| 88  | 27.5 | 35   | 0.241 |
| 89  | 27.5 | 37.5 | 0.310 |
| 90  | 27.5 | 40   | 0.374 |
| 91  | 30   | 30   | 0     |
| 92  | 30   | 32.5 | 0.080 |
| 93  | 30   | 35   | 0.154 |
| 94  | 30   | 37.5 | 0.223 |
| 95  | 30   | 40   | 0.287 |
| 96  | 32.5 | 32.5 | 0     |
| 97  | 32.5 | 35   | 0.074 |
| 98  | 32.5 | 37.5 | 0.143 |
| 99  | 32.5 | 40   | 0.207 |
| 100 | 35   | 35   | 0     |
| 101 | 35   | 37.5 | 0.068 |
| 102 | 35   | 40   | 0.133 |
| 103 | 37.5 | 37.5 | 0     |
| 104 | 37.5 | 40   | 0.064 |
| 105 | 40   | 40   | 0     |

---

2.2 Spatial heterogeneity level ( $\sigma$ ) and model performance

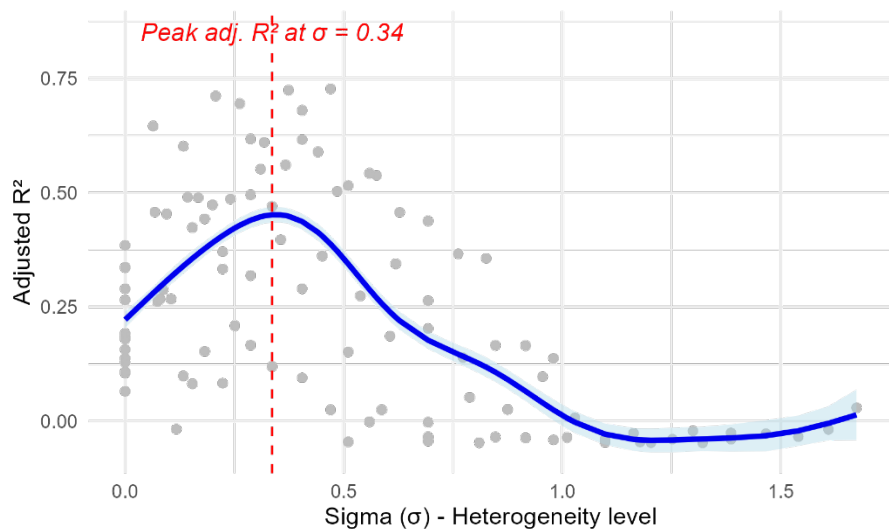

15 *Figure S 2.2.1* – Relationship between heterogeneity level ( $\sigma$ ) and model performance (Adjusted  $R^2$ ) for *Fagus sylvatica*. A generalized additive model (GAM) was fitted to predict  $R^2$  as a smooth function of  $\sigma$ . The shaded area indicates the 95% confidence interval of the GAM smooth. Model performance peaked at  $\sigma \approx 0.34$  and declined thereafter, suggesting optimal model fit under intermediate heterogeneity levels.

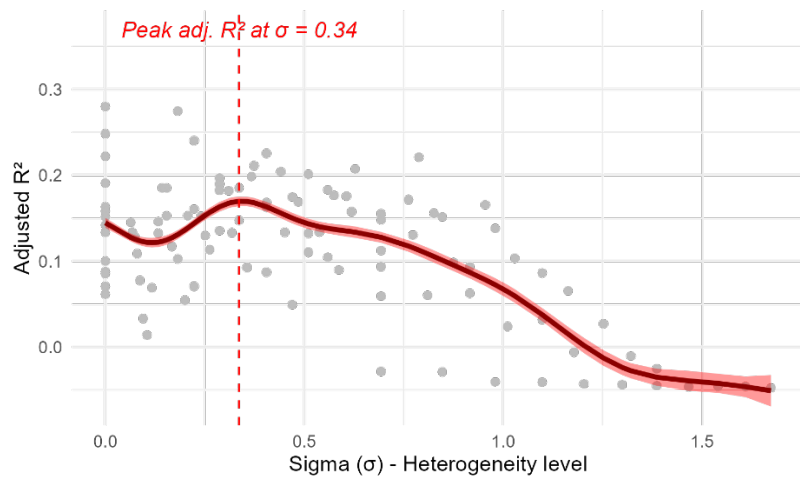

20 *Figure S 2.2.2* – Relationship between spatial heterogeneity ( $\sigma$ ) and model performance (Adjusted  $R^2$ ) for *Picea abies*. A generalized additive model (GAM) was used to estimate  $R^2$  as a smooth function of  $\sigma$ . The shaded area represents the 95% confidence interval. Model fit peaked at  $\sigma \approx 0.34$  and declined at higher heterogeneity levels.



25 *Table S 2.2* - Summary of Generalized Additive Models (GAMs) fitted to predict adjusted  $R^2$  as a function of soil moisture heterogeneity ( $\sigma$ ) for *Fagus sylvatica* and *Picea abies*. edf = estimated degrees of freedom, red.df = reference degrees of freedom. Parametric and smooth term estimates are provided along with model statistics including adjusted  $R^2$ , deviance explained (D), generalized cross-validation (GCV) score, scale estimate (scale), and sample size ( $n$ ). All smooth terms were highly significant ( $p < 0.001$ ).

| Species                |                         |                  |                 |                   |                |                |
|------------------------|-------------------------|------------------|-----------------|-------------------|----------------|----------------|
| <i>Fagus sylvatica</i> | <b>Parametric term</b>  | <i>Component</i> | <i>Estimate</i> | <i>Std. error</i> | <i>t-value</i> | <i>p-value</i> |
|                        |                         | Intercept        | 0.24            | 0.003             | 70.28          | <0.001         |
|                        | <b>Smooth term</b>      |                  | <i>edf</i>      | <i>red.df.</i>    | <i>F-value</i> |                |
|                        |                         | $\sigma$         | 8.15            | 8.8               | 251            | <0.001         |
|                        | <b>Model statistics</b> |                  |                 |                   |                |                |
|                        | adj. $R^2$              | <i>D</i>         | <i>GCV</i>      | <i>scale</i>      | <i>n</i>       |                |
|                        | 0.478                   | 47.90%           | 0.028           | 0.028             | 2415           |                |
| <i>Picea abies</i>     | <b>Parametric term</b>  | <i>Component</i> | <i>Estimate</i> | <i>Std. error</i> | <i>t-value</i> |                |
|                        |                         | Intercept        | 0.113           | 0.001             | 102.3          | <0.001         |
|                        | <b>Smooth term</b>      |                  | <i>edf</i>      | <i>red.df.</i>    | <i>F-value</i> |                |
|                        |                         | $\sigma$         | 8.7             | 8.9               | 296            | <0.001         |
|                        | <b>Model statistics</b> |                  |                 |                   |                |                |
|                        | adj. $R^2$              | <i>D</i>         | <i>GCV</i>      | <i>scale</i>      | <i>n</i>       |                |
|                        | 0.523                   | 52.50%           | 0.003           | 0.003             | 2415           |                |

### 30 2.3 Base annual probability of Bark beetle attack

We derived the base annual probability of bark beetle outbreaks (P<sub>bark</sub>) by adapting the theoretical probability of bark beetle disturbance in spruce-dominated forests (Hlásny et al., 2021, their Fig. 4 and Appendix 2) to baseline climate conditions (1979–1990) in Germany.

35 The method we used combined fixed percentages for the lower classes and an exponential progression for the higher classes, as follows:

1. *No Spruce*: this category represents the absence of spruce; hence the base probability of a bark beetle outbreak is 0%.
2. *Very Low*: we assigned to this class the first 5% of the range to capture very rare occurrences of bark beetle attacks.
3. *Low*: this category covers the next 10% (from 6 to 15%), which reflects low but non-negligible occurrences of outbreaks.
- 40 4. *Medium, High, and Very High*: the remaining 85% of the scale (from 16 to 100%) was divided between the three categories using an exponential progression. This approach was chosen to reflect the increasing intensity or abundance of spruce in a smooth manner, with progressively larger ranges as we move towards the higher classes. Furthermore, it ensures that the higher classes have larger ranges, which is appropriate for a classification where higher abundances are typically more variable.

45 The progression was defined using a base factor that determines how the range grows as we move from one class to the next. The exponential progression  $R_k$  (Eq. SM 1) represents the upper range limit of the  $k^{\text{th}}$  class, with  $k = 1, 2, 3$ , which corresponds to the *Medium*, *High*, and *Very High* classes.  $R_0$  represents the initial range size (e.g., 19 units for *Medium*, 31 units for *High* and 35 units for *Very High*),  $\lambda$  is the exponential growth factor and  $k$  is the index of the class and has a value of 1.5.

$$R_k = R_0 \cdot \lambda^k \quad (\text{SM 1})$$

50 Given the fixed total span of 85 units for the remaining scale [16,100], we chose a factor  $\lambda$  such that the total sum of all ranges for *Medium*, *High*, and *Very High* equals 85 units. The range [16,100] is therefore split into three sections such that the total span is covered by the classes with exponentially increasing intervals.

3.1.1. Beech sites

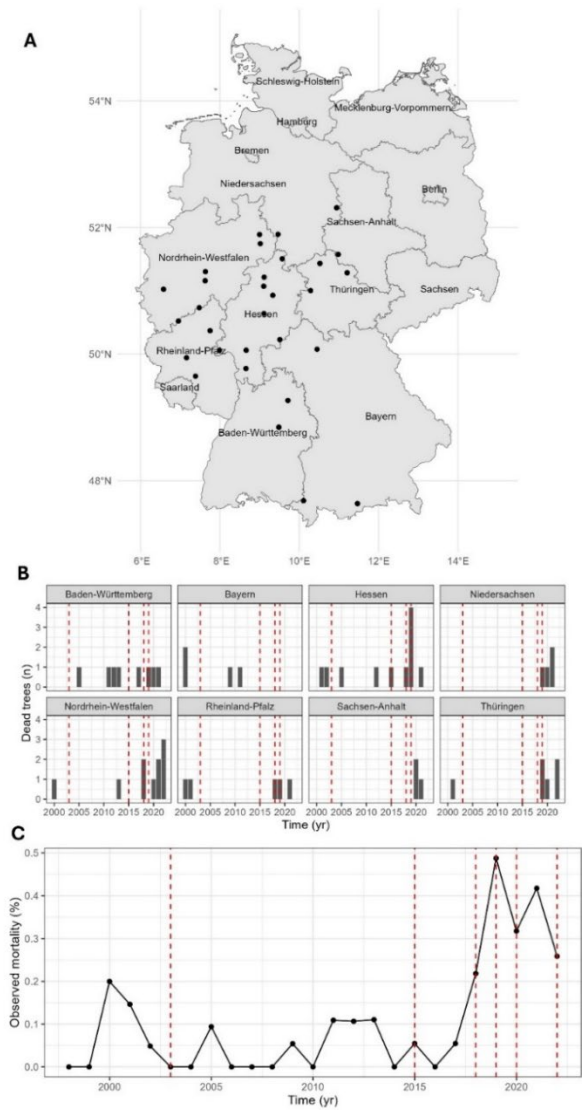

60 Figure S 3.1.1 – (A) Locations of ICP Forest Level I network plots in European beech (*Fagus sylvatica* L.)–dominated stands across the study region. (B) Total number of dead beech trees recorded within these plots over the observation period. (C) Observed mortality rate of beech trees, derived from repeated assessments at the same network plots.

3.1.2. Spruce sites

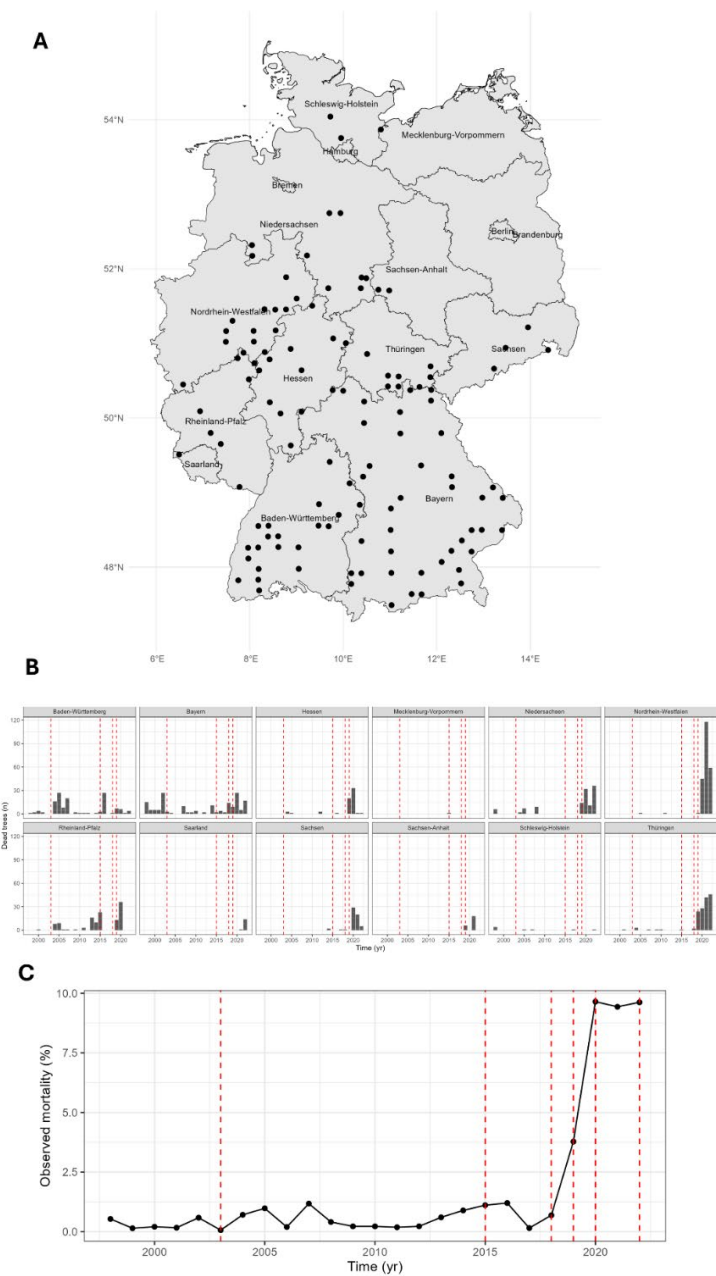

65 *Figure S 3.1.2.* – (A) Locations of ICP Forest Level I network plots in Norway spruce (*Picea abies* L.)-dominated stands across the study region. (B) Total number of dead beech trees recorded within these plots over the observation period. (C) Observed mortality rate of beech trees, derived from repeated assessments at the same network plots.

70 3.2.1. Beech sites

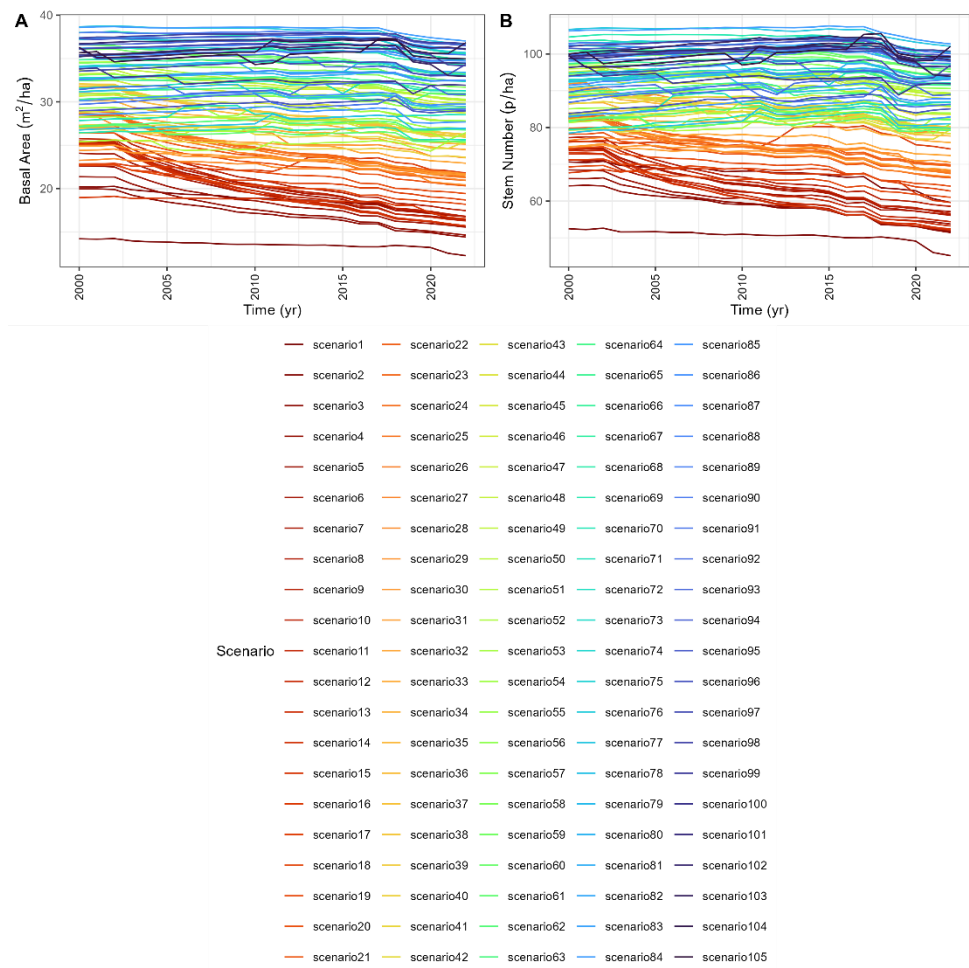

Figure S 3.2.1.1. – Stand dynamics averaged across the beech sites. (A) Basal area development over time. (B) Stem number of living trees over time. In both panels, we only show trees with a DBH > 40 cm.

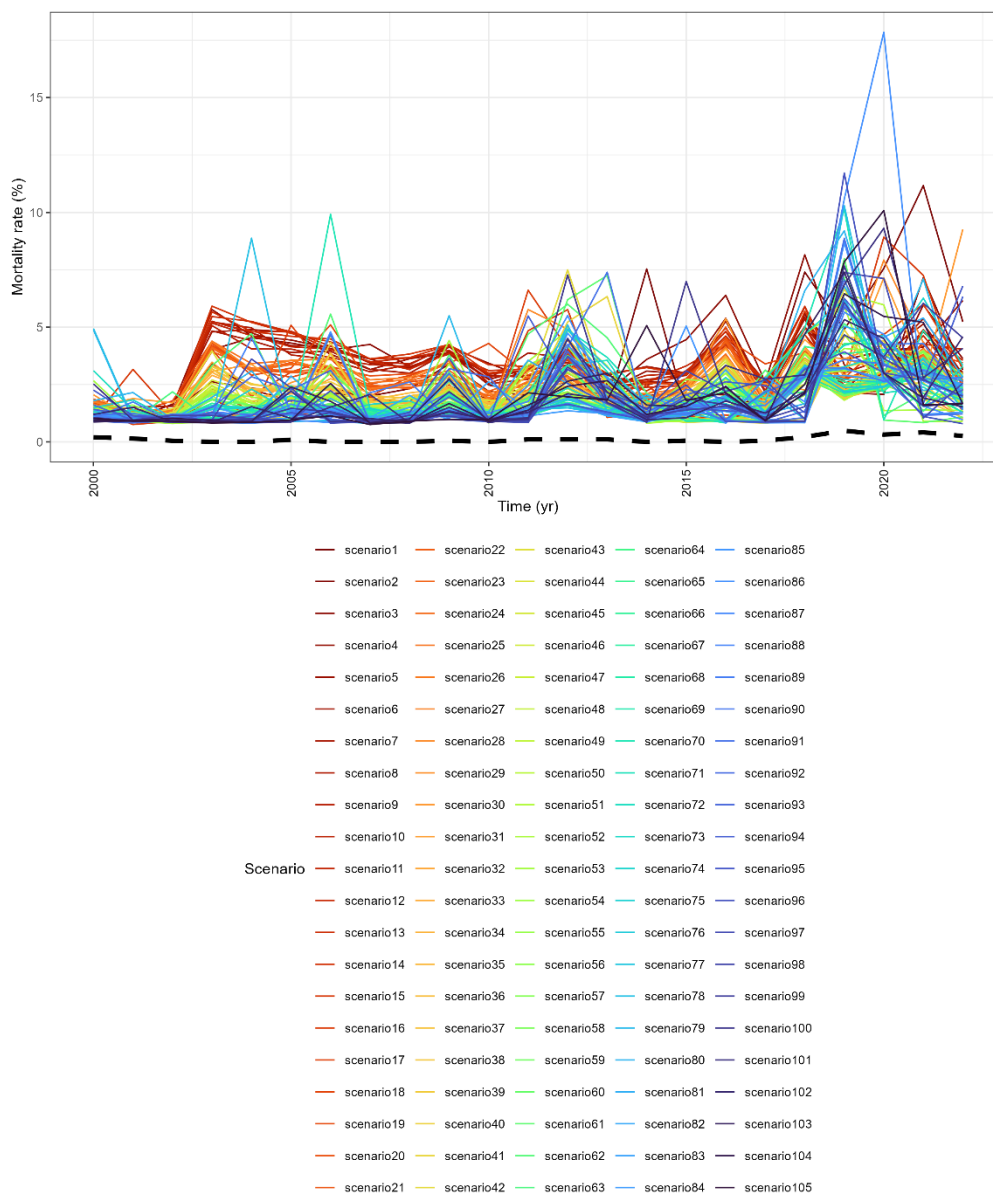

75

Figure S 3.2.1.2. – Simulated mortality rate over time averaged across beech sites and grouped by soil scenario. We only show trees with a DBH > 40 cm.

3.2.2. Spruce sites

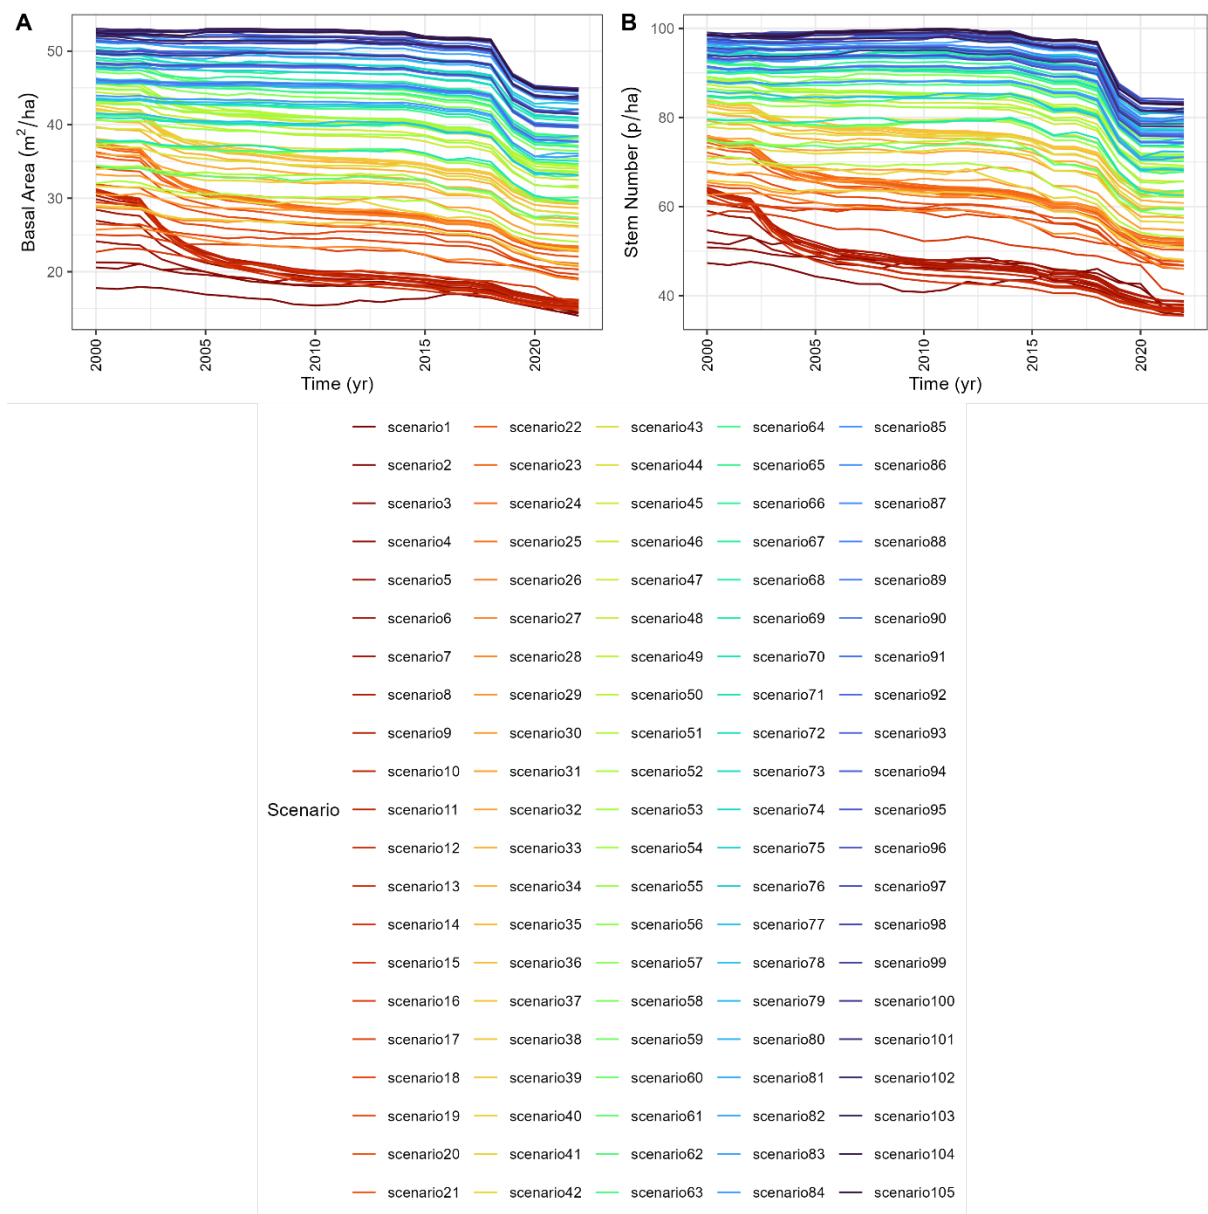

Figure S 3.2.2.1. – Stand dynamics averaged across the spruce sites (A) Basal area development over time. (B) Stem number of living trees over time. In both panels, we only show trees with a DBH > 40 cm.

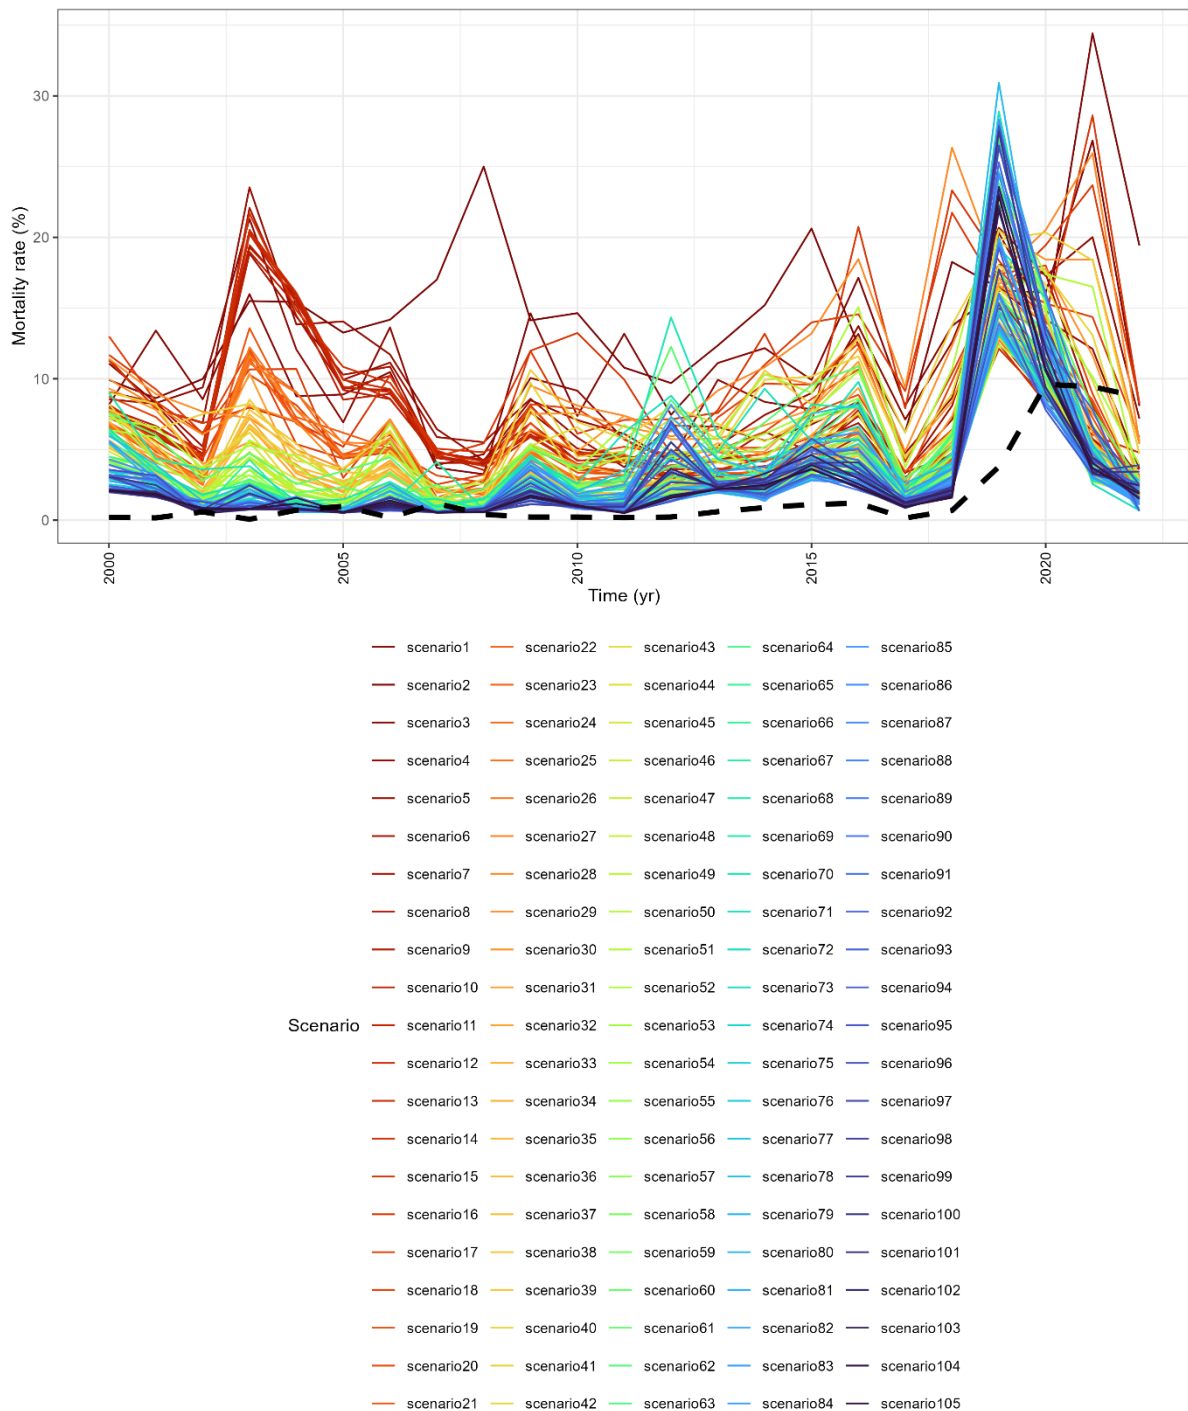

85 *Figure S 3.2.2.2. – Simulated mortality rate over time averaged across spruce sites and grouped soil scenario. We only show trees with a DBH > 40 cm.*



3.3.1. Beech site statistics

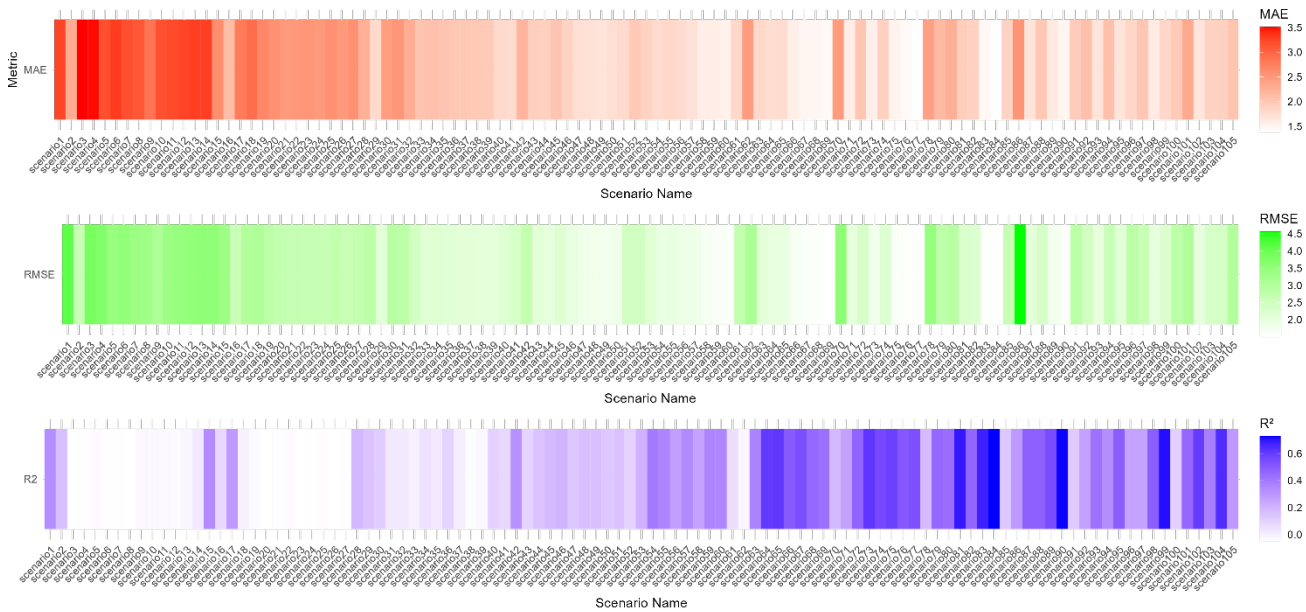

90 *Figure S 3.3.1 – Model statistics MAE, RMSE and  $R^2_{adj}$  for each soil scenario for European beech.*

Table S 3.3.1 – Summary of the model statistics (MAE, RMSE,  $R^2_{adj}$ , Slope, Intercept and P-value) for each scenario for the beech dominated sites. Highlighted in red are the two best performing scenarios according to their  $R^2_{adj}$ .

| Scenario | MAE  | RMSE | $R^2_{adj}$ | Slope | Intercept | P-Value |
|----------|------|------|-------------|-------|-----------|---------|
| 1        | 2.34 | 3.45 | 0.34        | 0.03  | 0.04      | 0       |
| 2        | 1.4  | 1.9  | 0.17        | 0.05  | 0.05      | 0.03    |
| 3        | 2.6  | 3.07 | -0.05       | 0     | 0.11      | 0.83    |
| 4        | 2.58 | 2.9  | -0.04       | 0.01  | 0.1       | 0.78    |
| 5        | 2.27 | 2.6  | -0.03       | -0.01 | 0.15      | 0.62    |
| 6        | 2.39 | 2.7  | -0.04       | -0.01 | 0.14      | 0.72    |
| 7        | 2.26 | 2.53 | -0.04       | 0.01  | 0.1       | 0.74    |
| 8        | 2.2  | 2.5  | -0.05       | 0     | 0.12      | 0.92    |
| 9        | 1.96 | 2.29 | -0.02       | -0.02 | 0.15      | 0.47    |
| 10       | 2.25 | 2.54 | -0.03       | -0.02 | 0.16      | 0.51    |
| 11       | 2.3  | 2.63 | -0.03       | -0.02 | 0.15      | 0.52    |
| 12       | 2.34 | 2.66 | -0.03       | -0.01 | 0.15      | 0.6     |
| 13       | 2.37 | 2.73 | -0.02       | -0.02 | 0.16      | 0.44    |
| 14       | 2.37 | 2.71 | 0.03        | -0.03 | 0.19      | 0.21    |
| 15       | 1.71 | 2.69 | 0.34        | 0.04  | 0.05      | 0       |
| 16       | 1.23 | 1.92 | 0.08        | 0.03  | 0.07      | 0.1     |
| 17       | 1.87 | 2.21 | 0.29        | 0.06  | -0.01     | 0       |
| 18       | 2.01 | 2.25 | 0           | -0.03 | 0.18      | 0.34    |
| 19       | 1.76 | 2.01 | -0.03       | 0.02  | 0.09      | 0.61    |
| 20       | 1.67 | 1.91 | -0.05       | 0     | 0.11      | 0.9     |
| 21       | 1.58 | 1.83 | -0.04       | 0.02  | 0.09      | 0.64    |
| 22       | 1.59 | 1.83 | -0.04       | 0.02  | 0.09      | 0.62    |
| 23       | 1.62 | 1.85 | -0.05       | 0.01  | 0.11      | 0.88    |
| 24       | 1.58 | 1.81 | -0.05       | 0.01  | 0.1       | 0.84    |
| 25       | 1.68 | 1.9  | -0.04       | -0.01 | 0.14      | 0.69    |
| 26       | 1.58 | 1.79 | -0.05       | 0     | 0.11      | 0.97    |
| 27       | 1.66 | 1.9  | -0.04       | -0.01 | 0.14      | 0.69    |
| 28       | 1.36 | 2.2  | 0.19        | 0.04  | 0.06      | 0.02    |
| 29       | 0.91 | 1.44 | 0.15        | 0.05  | 0.07      | 0.04    |
| 30       | 1.53 | 2.22 | 0.12        | 0.03  | 0.06      | 0.06    |
| 31       | 1.62 | 2.09 | 0.02        | 0.03  | 0.07      | 0.23    |
| 32       | 1.36 | 1.61 | 0.02        | 0.04  | 0.06      | 0.23    |
| 33       | 1.13 | 1.31 | 0           | 0.04  | 0.07      | 0.34    |
| 34       | 1.15 | 1.38 | 0.05        | 0.05  | 0.05      | 0.15    |
| 35       | 1.12 | 1.3  | 0.03        | 0.05  | 0.05      | 0.22    |
| 36       | 1.08 | 1.3  | 0.1         | 0.07  | 0.04      | 0.08    |

|    |      |      |       |      |       |      |
|----|------|------|-------|------|-------|------|
| 37 | 1.08 | 1.26 | 0.01  | 0.05 | 0.06  | 0.29 |
| 38 | 1.07 | 1.26 | -0.04 | 0.02 | 0.09  | 0.67 |
| 39 | 1.06 | 1.22 | -0.03 | 0.03 | 0.08  | 0.51 |
| 40 | 0.94 | 1.55 | 0.11  | 0.04 | 0.08  | 0.07 |
| 41 | 0.93 | 1.76 | 0.08  | 0.03 | 0.09  | 0.1  |
| 42 | 1.29 | 2.06 | 0.32  | 0.05 | 0.05  | 0    |
| 43 | 1.01 | 1.32 | 0.09  | 0.06 | 0.05  | 0.08 |
| 44 | 0.99 | 1.23 | 0.15  | 0.08 | 0.03  | 0.04 |
| 45 | 1.11 | 1.37 | 0.19  | 0.08 | 0.02  | 0.02 |
| 46 | 0.95 | 1.13 | 0.2   | 0.1  | 0.01  | 0.02 |
| 47 | 0.83 | 1.03 | 0.14  | 0.09 | 0.03  | 0.04 |
| 48 | 0.8  | 0.98 | 0.17  | 0.1  | 0.02  | 0.03 |
| 49 | 0.77 | 0.96 | 0.17  | 0.1  | 0.03  | 0.03 |
| 50 | 0.83 | 1.01 | 0.14  | 0.09 | 0.03  | 0.05 |
| 51 | 1    | 1.9  | 0.16  | 0.03 | 0.08  | 0.03 |
| 52 | 1.12 | 1.81 | 0.1   | 0.03 | 0.08  | 0.08 |
| 53 | 0.98 | 1.44 | 0.21  | 0.06 | 0.05  | 0.02 |
| 54 | 0.87 | 1.17 | 0.4   | 0.1  | 0.01  | 0    |
| 55 | 0.91 | 1.14 | 0.36  | 0.11 | 0     | 0    |
| 56 | 0.87 | 1.08 | 0.27  | 0.11 | 0.01  | 0.01 |
| 57 | 0.79 | 1.06 | 0.34  | 0.11 | 0.02  | 0    |
| 58 | 0.66 | 0.88 | 0.26  | 0.12 | 0.03  | 0.01 |
| 59 | 0.67 | 0.81 | 0.37  | 0.16 | -0.01 | 0    |
| 60 | 0.62 | 0.79 | 0.36  | 0.15 | 0.01  | 0    |
| 61 | 1.03 | 2.24 | 0.07  | 0.02 | 0.09  | 0.13 |
| 62 | 1.6  | 2.47 | -0.02 | 0.01 | 0.1   | 0.44 |
| 63 | 0.93 | 1.39 | 0.37  | 0.08 | 0.04  | 0    |
| 64 | 0.86 | 1.25 | 0.61  | 0.11 | 0.01  | 0    |
| 65 | 0.86 | 1.23 | 0.62  | 0.11 | 0.01  | 0    |
| 66 | 0.65 | 0.87 | 0.5   | 0.15 | 0     | 0    |
| 67 | 0.57 | 0.83 | 0.54  | 0.15 | 0.02  | 0    |
| 68 | 0.57 | 0.75 | 0.46  | 0.17 | 0     | 0    |
| 69 | 0.53 | 0.69 | 0.44  | 0.17 | 0.01  | 0    |
| 70 | 1.62 | 3.01 | 0.18  | 0.02 | 0.08  | 0.02 |
| 71 | 0.73 | 1.46 | 0.27  | 0.05 | 0.07  | 0.01 |
| 72 | 1.1  | 1.67 | 0.47  | 0.07 | 0.03  | 0    |
| 73 | 0.65 | 1.09 | 0.62  | 0.11 | 0.03  | 0    |
| 74 | 0.98 | 1.49 | 0.56  | 0.09 | 0.02  | 0    |
| 75 | 0.61 | 0.84 | 0.59  | 0.16 | 0     | 0    |
| 76 | 0.55 | 0.8  | 0.52  | 0.15 | 0.02  | 0    |

|     |      |      |      |      |      |      |
|-----|------|------|------|------|------|------|
| 77  | 0.49 | 0.75 | 0.54 | 0.15 | 0.03 | 0    |
| 78  | 1.55 | 2.87 | 0.18 | 0.03 | 0.07 | 0.03 |
| 79  | 1.27 | 2.22 | 0.45 | 0.05 | 0.05 | 0    |
| 80  | 1.35 | 2.27 | 0.44 | 0.05 | 0.04 | 0    |
| 81  | 1.02 | 1.59 | 0.69 | 0.09 | 0.02 | 0    |
| 82  | 0.99 | 1.55 | 0.47 | 0.07 | 0.04 | 0    |
| 83  | 0.55 | 0.81 | 0.68 | 0.16 | 0.01 | 0    |
| 84  | 0.48 | 0.76 | 0.73 | 0.17 | 0.02 | 0    |
| 85  | 1.03 | 2.13 | 0.14 | 0.03 | 0.08 | 0.05 |
| 86  | 1.69 | 4.12 | 0.29 | 0.02 | 0.08 | 0    |
| 87  | 0.81 | 1.41 | 0.49 | 0.08 | 0.05 | 0    |
| 88  | 1.1  | 1.68 | 0.49 | 0.07 | 0.03 | 0    |
| 89  | 0.72 | 1.02 | 0.55 | 0.12 | 0.01 | 0    |
| 90  | 0.57 | 0.85 | 0.72 | 0.16 | 0.01 | 0    |
| 91  | 1.11 | 2.35 | 0.13 | 0.03 | 0.09 | 0.05 |
| 92  | 1.23 | 1.77 | 0.27 | 0.05 | 0.05 | 0.01 |
| 93  | 0.8  | 1.36 | 0.42 | 0.08 | 0.05 | 0    |
| 94  | 1.17 | 1.98 | 0.33 | 0.05 | 0.05 | 0    |
| 95  | 0.78 | 1.47 | 0.5  | 0.07 | 0.05 | 0    |
| 96  | 1.04 | 2.38 | 0.27 | 0.03 | 0.08 | 0.01 |
| 97  | 1.19 | 2.05 | 0.26 | 0.04 | 0.07 | 0.01 |
| 98  | 0.73 | 1.38 | 0.49 | 0.08 | 0.05 | 0    |
| 99  | 0.93 | 1.6  | 0.71 | 0.08 | 0.03 | 0    |
| 100 | 1.13 | 2.31 | 0.11 | 0.03 | 0.09 | 0.07 |
| 101 | 1.44 | 2.42 | 0.46 | 0.05 | 0.04 | 0    |
| 102 | 0.76 | 1.36 | 0.6  | 0.09 | 0.04 | 0    |
| 103 | 1.02 | 1.71 | 0.38 | 0.06 | 0.05 | 0    |
| 104 | 1.03 | 1.76 | 0.65 | 0.07 | 0.04 | 0    |
| 105 | 1.16 | 2.5  | 0.29 | 0.03 | 0.07 | 0    |

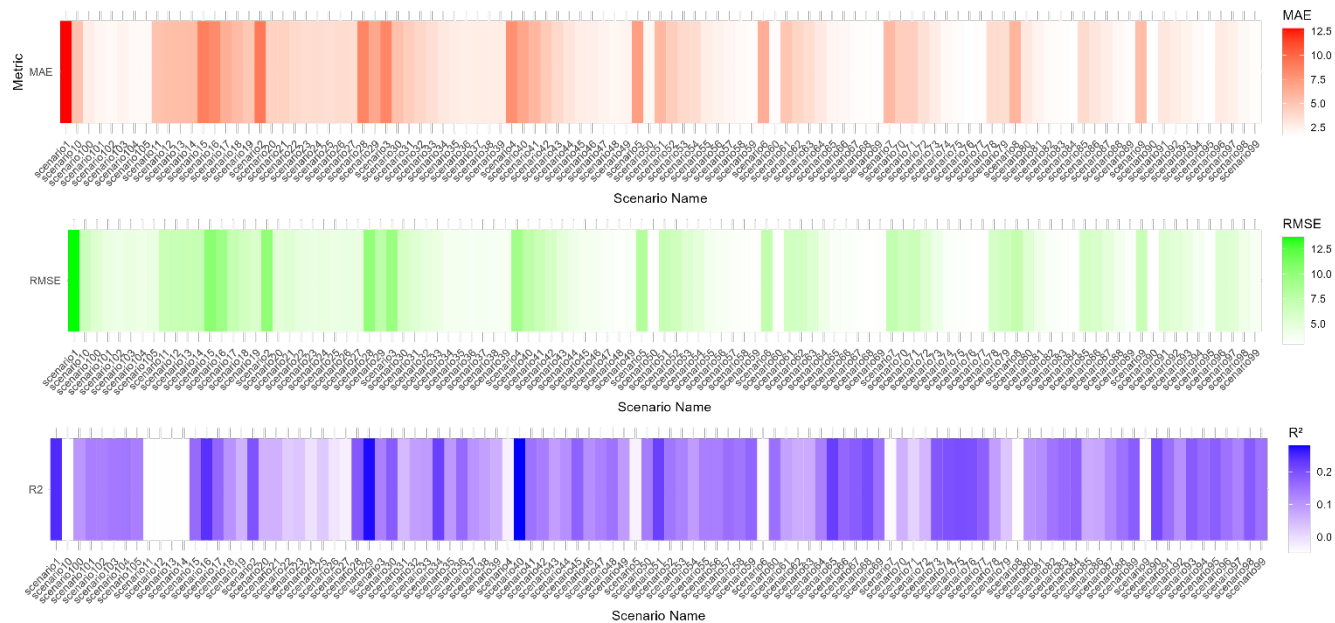

Figure S 3.3.2 – Model statistics (MAE, RMSE and  $R^2_{adj}$ ) for each soil scenario for spruce.

100 *Table S 3.3.2 – Summary of the model statistics (MAE, RMSE,  $R^2_{adj}$ , Slope, Intercept and P-value) for each scenario for the spruce dominated sites. Highlighted in red are the two best performing scenarios.*

| Scenario | MAE  | RMSE  | $R^2_{adj}$ | Slope | Intercept | P-Value |
|----------|------|-------|-------------|-------|-----------|---------|
| 1        | 12.8 | 13.72 | 0.25        | 0.27  | -2.17     | 0.01    |
| 2        | 9.24 | 10.16 | 0.2         | 0.29  | -1.35     | 0.02    |
| 3        | 8.53 | 9.56  | 0.13        | 0.25  | -0.7      | 0.05    |
| 4        | 7.94 | 9.24  | -0.03       | 0.08  | 1.06      | 0.54    |
| 5        | 7.22 | 8.32  | -0.03       | 0.08  | 1.12      | 0.54    |
| 6        | 6.34 | 7.46  | -0.04       | 0.06  | 1.4       | 0.71    |
| 7        | 5.74 | 7.3   | -0.04       | 0.05  | 1.46      | 0.72    |
| 8        | 6.01 | 7.2   | -0.04       | 0.04  | 1.5       | 0.77    |
| 9        | 5.57 | 6.87  | -0.04       | 0.04  | 1.54      | 0.79    |
| 10       | 5.23 | 6.62  | -0.05       | 0.03  | 1.6       | 0.83    |
| 11       | 5.23 | 6.79  | -0.05       | 0.02  | 1.67      | 0.88    |
| 12       | 5.42 | 6.89  | -0.05       | -0.03 | 1.97      | 0.85    |
| 13       | 5.47 | 6.95  | -0.05       | -0.03 | 1.97      | 0.86    |
| 14       | 5.54 | 7.05  | -0.05       | 0     | 1.83      | 0.98    |
| 15       | 8.89 | 10.4  | 0.16        | 0.22  | -0.49     | 0.03    |
| 16       | 8.25 | 9.47  | 0.24        | 0.28  | -0.96     | 0.01    |
| 17       | 6.31 | 7.11  | 0.17        | 0.33  | -0.8      | 0.03    |
| 18       | 5.63 | 6.37  | 0.1         | 0.28  | -0.07     | 0.07    |
| 19       | 4.95 | 5.77  | 0.06        | 0.25  | 0.31      | 0.14    |
| 20       | 4.29 | 5.05  | 0.06        | 0.28  | 0.36      | 0.14    |
| 21       | 4.3  | 5.36  | 0.06        | 0.25  | 0.46      | 0.13    |
| 22       | 3.87 | 4.74  | 0.02        | 0.24  | 0.67      | 0.23    |
| 23       | 3.68 | 4.53  | 0.03        | 0.27  | 0.6       | 0.2     |
| 24       | 3.72 | 4.65  | -0.01       | 0.19  | 0.97      | 0.36    |
| 25       | 3.55 | 4.44  | 0.03        | 0.26  | 0.67      | 0.22    |
| 26       | 3.7  | 4.6   | -0.01       | 0.19  | 0.99      | 0.39    |
| 27       | 3.69 | 4.59  | -0.03       | 0.15  | 1.19      | 0.51    |
| 28       | 8.54 | 10.09 | 0.19        | 0.21  | -0.34     | 0.02    |
| 29       | 6.74 | 7.61  | 0.27        | 0.34  | -0.94     | 0.01    |
| 30       | 5.27 | 6.07  | 0.19        | 0.33  | -0.34     | 0.02    |
| 31       | 4.58 | 5.45  | 0.05        | 0.23  | 0.56      | 0.16    |
| 32       | 4.03 | 4.85  | 0.09        | 0.29  | 0.45      | 0.09    |
| 33       | 3.56 | 4.51  | 0.09        | 0.29  | 0.58      | 0.08    |
| 34       | 3.04 | 3.82  | 0.22        | 0.47  | -0.1      | 0.01    |
| 35       | 2.82 | 3.81  | 0.1         | 0.35  | 0.6       | 0.08    |

|    |      |      |      |      |       |      |
|----|------|------|------|------|-------|------|
| 36 | 2.63 | 3.54 | 0.17 | 0.45 | 0.28  | 0.03 |
| 37 | 2.75 | 3.7  | 0.1  | 0.38 | 0.51  | 0.07 |
| 38 | 2.75 | 3.63 | 0.09 | 0.38 | 0.55  | 0.09 |
| 39 | 2.76 | 3.66 | 0.07 | 0.36 | 0.62  | 0.13 |
| 40 | 6.8  | 7.67 | 0.28 | 0.33 | -0.87 | 0.01 |
| 41 | 5.85 | 6.76 | 0.15 | 0.28 | -0.16 | 0.04 |
| 42 | 4.78 | 5.94 | 0.14 | 0.27 | 0.2   | 0.05 |
| 43 | 3.92 | 4.97 | 0.09 | 0.26 | 0.62  | 0.09 |
| 44 | 3.22 | 4.24 | 0.11 | 0.31 | 0.62  | 0.07 |
| 45 | 2.72 | 3.8  | 0.18 | 0.38 | 0.52  | 0.03 |
| 46 | 2.6  | 3.73 | 0.11 | 0.35 | 0.72  | 0.07 |
| 47 | 2.39 | 3.44 | 0.13 | 0.41 | 0.63  | 0.05 |
| 48 | 2.14 | 3.24 | 0.15 | 0.45 | 0.58  | 0.04 |
| 49 | 2.34 | 3.41 | 0.09 | 0.38 | 0.76  | 0.09 |
| 50 | 2.12 | 3.15 | 0.14 | 0.47 | 0.62  | 0.05 |
| 51 | 5.73 | 7.03 | 0.22 | 0.27 | -0.1  | 0.01 |
| 52 | 4.61 | 6.46 | 0.15 | 0.23 | 0.42  | 0.04 |
| 53 | 3.92 | 5.46 | 0.13 | 0.25 | 0.63  | 0.05 |
| 54 | 3.7  | 4.89 | 0.09 | 0.25 | 0.77  | 0.09 |
| 55 | 2.74 | 3.88 | 0.13 | 0.34 | 0.72  | 0.05 |
| 56 | 2.49 | 3.61 | 0.13 | 0.37 | 0.73  | 0.05 |
| 57 | 2.21 | 3.38 | 0.16 | 0.41 | 0.74  | 0.03 |
| 58 | 2    | 3.21 | 0.15 | 0.44 | 0.8   | 0.04 |
| 59 | 1.9  | 3.08 | 0.17 | 0.48 | 0.67  | 0.03 |
| 60 | 1.92 | 3.08 | 0.16 | 0.48 | 0.7   | 0.04 |
| 61 | 4.98 | 6.32 | 0.09 | 0.22 | 0.49  | 0.1  |
| 62 | 4.16 | 6.16 | 0.07 | 0.18 | 0.97  | 0.12 |
| 63 | 3.66 | 5.42 | 0.07 | 0.2  | 0.99  | 0.12 |
| 64 | 2.95 | 4.18 | 0.13 | 0.31 | 0.75  | 0.05 |
| 65 | 2.28 | 3.44 | 0.23 | 0.43 | 0.57  | 0.01 |
| 66 | 2.12 | 3.38 | 0.17 | 0.41 | 0.77  | 0.03 |
| 67 | 1.88 | 3.08 | 0.18 | 0.48 | 0.73  | 0.02 |
| 68 | 1.82 | 2.99 | 0.21 | 0.51 | 0.66  | 0.02 |
| 69 | 1.79 | 3.05 | 0.16 | 0.48 | 0.83  | 0.04 |
| 70 | 4.55 | 6.45 | 0.06 | 0.17 | 0.89  | 0.13 |
| 71 | 4.51 | 6.75 | 0.01 | 0.12 | 1.21  | 0.27 |
| 72 | 3.49 | 5.44 | 0.05 | 0.18 | 1.14  | 0.15 |
| 73 | 2.78 | 4.3  | 0.19 | 0.31 | 0.82  | 0.02 |
| 74 | 2.1  | 3.34 | 0.2  | 0.42 | 0.73  | 0.02 |
| 75 | 1.88 | 3.11 | 0.2  | 0.47 | 0.75  | 0.02 |

|            |             |             |             |             |             |             |
|------------|-------------|-------------|-------------|-------------|-------------|-------------|
| <b>76</b>  | <b>1.7</b>  | <b>3</b>    | <b>0.2</b>  | <b>0.5</b>  | <b>0.82</b> | <b>0.02</b> |
| <b>77</b>  | 1.77        | 3.01        | 0.18        | 0.49        | 0.84        | 0.03        |
| <b>78</b>  | 3.74        | 5.99        | 0.09        | 0.19        | 0.98        | 0.09        |
| <b>79</b>  | 3.64        | 6.47        | 0.03        | 0.13        | 1.28        | 0.2         |
| <b>80</b>  | 3.02        | 5.45        | 0.1         | 0.2         | 1.11        | 0.07        |
| <b>81</b>  | 2.39        | 4.16        | 0.11        | 0.28        | 1.06        | 0.06        |
| <b>82</b>  | 1.93        | 3.4         | 0.15        | 0.39        | 0.95        | 0.04        |
| <b>83</b>  | 1.86        | 3.16        | 0.16        | 0.44        | 0.91        | 0.03        |
| <b>84</b>  | 1.7         | 3.03        | 0.17        | 0.48        | 0.91        | 0.03        |
| <b>85</b>  | 3.78        | 6.1         | 0.07        | 0.17        | 1.12        | 0.12        |
| <b>86</b>  | 3.16        | 5.81        | 0.08        | 0.18        | 1.17        | 0.11        |
| <b>87</b>  | 2.68        | 4.95        | 0.12        | 0.23        | 1.09        | 0.06        |
| <b>88</b>  | 2.14        | 3.96        | 0.15        | 0.32        | 0.99        | 0.04        |
| <b>89</b>  | 1.85        | 3.3         | 0.18        | 0.42        | 0.93        | 0.02        |
| <b>90</b>  | <b>1.69</b> | <b>2.96</b> | <b>0.21</b> | <b>0.51</b> | <b>0.86</b> | <b>0.02</b> |
| <b>91</b>  | 3.07        | 5.5         | 0.16        | 0.23        | 0.98        | 0.03        |
| <b>92</b>  | 2.74        | 5.12        | 0.11        | 0.22        | 1.11        | 0.07        |
| <b>93</b>  | 2.4         | 4.63        | 0.19        | 0.28        | 0.97        | 0.02        |
| <b>94</b>  | 2.01        | 3.77        | 0.16        | 0.34        | 1.01        | 0.03        |
| <b>95</b>  | 1.71        | 3.16        | 0.18        | 0.44        | 0.97        | 0.02        |
| <b>96</b>  | 2.89        | 5.57        | 0.15        | 0.22        | 1.02        | 0.04        |
| <b>97</b>  | 2.6         | 5.26        | 0.13        | 0.22        | 1.15        | 0.05        |
| <b>98</b>  | 2.06        | 4.19        | 0.19        | 0.31        | 1.03        | 0.02        |
| <b>99</b>  | 1.89        | 3.59        | 0.15        | 0.36        | 1.05        | 0.04        |
| <b>100</b> | 2.69        | 5.4         | 0.1         | 0.2         | 1.17        | 0.08        |
| <b>101</b> | 2.3         | 4.53        | 0.13        | 0.26        | 1.1         | 0.05        |
| <b>102</b> | 2.01        | 4.3         | 0.13        | 0.27        | 1.18        | 0.05        |
| <b>103</b> | 2.36        | 4.65        | 0.14        | 0.26        | 1.11        | 0.04        |
| <b>104</b> | 2.01        | 4.29        | 0.15        | 0.28        | 1.13        | 0.04        |
| <b>105</b> | 2.04        | 4.45        | 0.13        | 0.26        | 1.17        | 0.05        |



3.3.3. Spruce with no bark beetle submodel

105 *Figure S 3.3.3 – Model statistics (MAE, RMSE and  $R^2_{adj}$ ) for each soil scenario for spruce simulations in the absence of the bark beetle model.*

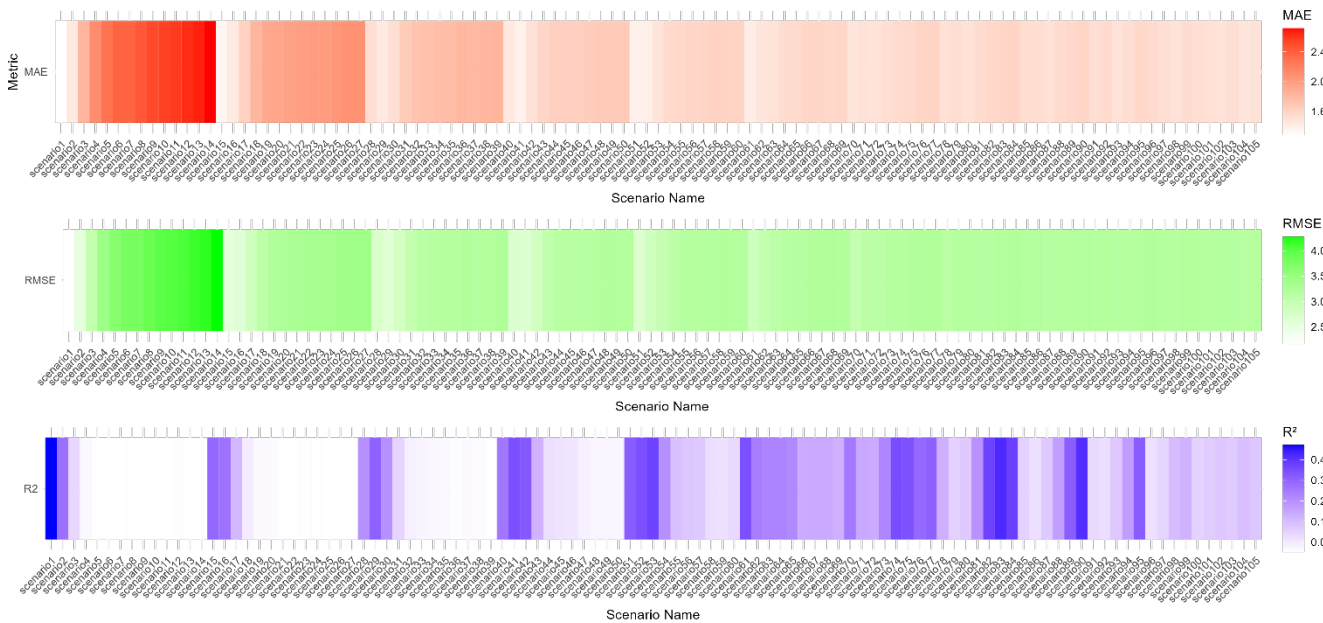

110 *Table S 3.3.3* – Summary of model statistics (MAE, RMSE,  $R^2_{adj}$ , Slope, Intercept and P-value) for each scenario for the spruce-dominated sites. In this case, the bark beetle routine was switched off. Highlighted in red are the two best soil moisture scenarios selected as best ones in the bark beetle simulations.

| Scenario | MAE  | RMSE | $R^2_{adj}$ | Slope | Intercept | P-Value |
|----------|------|------|-------------|-------|-----------|---------|
| 1        | 1.29 | 2.17 | 0.47        | 1.11  | 0.3       | 0       |
| 2        | 1.44 | 2.54 | 0.27        | 0.91  | 0.63      | 0.01    |
| 3        | 1.83 | 3.03 | 0.04        | 0.47  | 1.08      | 0.18    |
| 4        | 2.13 | 3.45 | -0.03       | 0.17  | 1.51      | 0.59    |
| 5        | 2.29 | 3.66 | -0.04       | 0.07  | 1.67      | 0.81    |
| 6        | 2.38 | 3.79 | -0.05       | 0.02  | 1.76      | 0.94    |
| 7        | 2.38 | 3.8  | -0.05       | 0.03  | 1.74      | 0.91    |
| 8        | 2.45 | 3.91 | -0.05       | 0.01  | 1.79      | 0.97    |
| 9        | 2.52 | 4    | -0.05       | -0.02 | 1.84      | 0.94    |
| 10       | 2.55 | 4.03 | -0.05       | -0.02 | 1.85      | 0.94    |
| 11       | 2.58 | 4.08 | -0.05       | -0.02 | 1.85      | 0.93    |
| 12       | 2.64 | 4.16 | -0.05       | -0.04 | 1.9       | 0.86    |
| 13       | 2.67 | 4.2  | -0.05       | -0.03 | 1.88      | 0.89    |
| 14       | 2.71 | 4.28 | -0.05       | -0.04 | 1.89      | 0.87    |
| 15       | 1.36 | 2.56 | 0.29        | 0.82  | 0.84      | 0       |
| 16       | 1.45 | 2.61 | 0.27        | 1     | 0.77      | 0.01    |
| 17       | 1.63 | 2.86 | 0.11        | 0.82  | 0.95      | 0.07    |
| 18       | 1.83 | 3.11 | -0.01       | 0.42  | 1.32      | 0.37    |
| 19       | 1.93 | 3.23 | -0.04       | 0.22  | 1.54      | 0.63    |
| 20       | 1.94 | 3.25 | -0.04       | 0.2   | 1.57      | 0.66    |
| 21       | 1.98 | 3.3  | -0.04       | 0.14  | 1.63      | 0.74    |
| 22       | 2    | 3.34 | -0.04       | 0.1   | 1.68      | 0.81    |
| 23       | 2.01 | 3.35 | -0.05       | 0.09  | 1.69      | 0.84    |
| 24       | 2.02 | 3.35 | -0.05       | 0.09  | 1.69      | 0.84    |
| 25       | 2.06 | 3.39 | -0.05       | 0.05  | 1.74      | 0.9     |
| 26       | 2.08 | 3.41 | -0.05       | 0.04  | 1.74      | 0.91    |
| 27       | 2.08 | 3.41 | -0.05       | 0.05  | 1.74      | 0.9     |
| 28       | 1.52 | 2.74 | 0.2         | 0.74  | 0.98      | 0.02    |
| 29       | 1.44 | 2.63 | 0.3         | 1.22  | 0.76      | 0       |
| 30       | 1.53 | 2.8  | 0.2         | 1.28  | 0.76      | 0.02    |
| 31       | 1.67 | 3.01 | 0.05        | 0.91  | 1.07      | 0.16    |
| 32       | 1.73 | 3.13 | -0.01       | 0.58  | 1.35      | 0.4     |
| 33       | 1.75 | 3.16 | -0.02       | 0.47  | 1.43      | 0.49    |
| 34       | 1.77 | 3.17 | -0.03       | 0.4   | 1.48      | 0.56    |
| 35       | 1.79 | 3.18 | -0.03       | 0.37  | 1.5       | 0.58    |

|    |      |      |       |      |      |      |
|----|------|------|-------|------|------|------|
| 36 | 1.82 | 3.22 | -0.04 | 0.23 | 1.61 | 0.72 |
| 37 | 1.81 | 3.2  | -0.04 | 0.29 | 1.55 | 0.65 |
| 38 | 1.82 | 3.21 | -0.04 | 0.24 | 1.59 | 0.69 |
| 39 | 1.84 | 3.25 | -0.04 | 0.17 | 1.65 | 0.77 |
| 40 | 1.46 | 2.68 | 0.26  | 1.08 | 0.87 | 0.01 |
| 41 | 1.39 | 2.66 | 0.35  | 1.46 | 0.76 | 0    |
| 42 | 1.5  | 2.85 | 0.33  | 2.27 | 0.39 | 0    |
| 43 | 1.59 | 3.04 | 0.12  | 1.86 | 0.7  | 0.06 |
| 44 | 1.64 | 3.14 | 0.02  | 1.21 | 1.11 | 0.24 |
| 45 | 1.64 | 3.14 | 0.02  | 1.13 | 1.16 | 0.26 |
| 46 | 1.64 | 3.15 | 0.01  | 1.08 | 1.19 | 0.29 |
| 47 | 1.66 | 3.18 | -0.01 | 0.84 | 1.32 | 0.41 |
| 48 | 1.67 | 3.2  | -0.03 | 0.67 | 1.42 | 0.51 |
| 49 | 1.68 | 3.2  | -0.02 | 0.7  | 1.4  | 0.48 |
| 50 | 1.68 | 3.21 | -0.03 | 0.6  | 1.45 | 0.54 |
| 51 | 1.4  | 2.67 | 0.32  | 1.34 | 0.83 | 0    |
| 52 | 1.41 | 2.86 | 0.34  | 2.25 | 0.56 | 0    |
| 53 | 1.49 | 2.97 | 0.37  | 3.41 | 0.08 | 0    |
| 54 | 1.56 | 3.1  | 0.2   | 3.16 | 0.38 | 0.02 |
| 55 | 1.58 | 3.17 | 0.09  | 2.52 | 0.72 | 0.09 |
| 56 | 1.59 | 3.18 | 0.08  | 2.45 | 0.78 | 0.11 |
| 57 | 1.6  | 3.19 | 0.07  | 2.35 | 0.85 | 0.12 |
| 58 | 1.62 | 3.22 | 0.02  | 1.79 | 1.07 | 0.23 |
| 59 | 1.61 | 3.22 | 0.02  | 1.74 | 1.08 | 0.25 |
| 60 | 1.61 | 3.2  | 0.04  | 1.97 | 0.97 | 0.19 |
| 61 | 1.41 | 2.88 | 0.35  | 2.37 | 0.58 | 0    |
| 62 | 1.47 | 3.03 | 0.24  | 2.48 | 0.72 | 0.01 |
| 63 | 1.5  | 3.08 | 0.23  | 3.01 | 0.52 | 0.01 |
| 64 | 1.55 | 3.16 | 0.23  | 4.31 | 0.17 | 0.01 |
| 65 | 1.56 | 3.17 | 0.22  | 4.33 | 0.24 | 0.01 |
| 66 | 1.59 | 3.22 | 0.14  | 3.81 | 0.57 | 0.04 |
| 67 | 1.59 | 3.22 | 0.14  | 3.96 | 0.53 | 0.04 |
| 68 | 1.58 | 3.23 | 0.14  | 4.2  | 0.47 | 0.04 |
| 69 | 1.58 | 3.23 | 0.13  | 3.88 | 0.55 | 0.05 |
| 70 | 1.47 | 3.02 | 0.25  | 2.42 | 0.77 | 0.01 |
| 71 | 1.51 | 3.1  | 0.14  | 2.04 | 0.95 | 0.04 |
| 72 | 1.5  | 3.13 | 0.14  | 2.2  | 0.97 | 0.04 |
| 73 | 1.53 | 3.16 | 0.22  | 3.87 | 0.49 | 0.01 |
| 74 | 1.56 | 3.18 | 0.35  | 5.99 | 0.04 | 0    |
| 75 | 1.57 | 3.2  | 0.34  | 6.22 | 0.03 | 0    |

|            |            |             |             |             |             |          |
|------------|------------|-------------|-------------|-------------|-------------|----------|
| <b>76</b>  | <b>1.6</b> | <b>3.23</b> | <b>0.29</b> | <b>6.03</b> | <b>0.24</b> | <b>0</b> |
| <b>77</b>  | 1.6        | 3.24        | 0.31        | 6.92        | 0.09        | 0        |
| <b>78</b>  | 1.51       | 3.11        | 0.13        | 1.94        | 1           | 0.05     |
| <b>79</b>  | 1.53       | 3.19        | 0.05        | 1.42        | 1.29        | 0.15     |
| <b>80</b>  | 1.51       | 3.17        | 0.07        | 1.54        | 1.24        | 0.11     |
| <b>81</b>  | 1.54       | 3.17        | 0.2         | 3.22        | 0.81        | 0.02     |
| <b>82</b>  | 1.58       | 3.19        | 0.37        | 5.74        | 0.35        | 0        |
| <b>83</b>  | 1.59       | 3.22        | 0.42        | 7.34        | 0.06        | 0        |
| <b>84</b>  | 1.61       | 3.24        | 0.38        | 7.26        | 0.19        | 0        |
| <b>85</b>  | 1.54       | 3.19        | 0.06        | 1.46        | 1.27        | 0.15     |
| <b>86</b>  | 1.53       | 3.2         | 0.02        | 0.92        | 1.43        | 0.23     |
| <b>87</b>  | 1.51       | 3.17        | 0.07        | 1.37        | 1.31        | 0.12     |
| <b>88</b>  | 1.55       | 3.19        | 0.16        | 2.9         | 0.94        | 0.03     |
| <b>89</b>  | 1.57       | 3.2         | 0.32        | 5.21        | 0.47        | 0        |
| <b>90</b>  | <b>1.6</b> | <b>3.21</b> | <b>0.41</b> | <b>6.86</b> | <b>0.26</b> | <b>0</b> |
| <b>91</b>  | 1.53       | 3.19        | 0.04        | 1.04        | 1.4         | 0.19     |
| <b>92</b>  | 1.56       | 3.21        | 0.03        | 0.91        | 1.45        | 0.22     |
| <b>93</b>  | 1.5        | 3.17        | 0.08        | 1.39        | 1.32        | 0.11     |
| <b>94</b>  | 1.53       | 3.18        | 0.17        | 2.88        | 0.98        | 0.03     |
| <b>95</b>  | 1.58       | 3.2         | 0.32        | 4.97        | 0.63        | 0        |
| <b>96</b>  | 1.56       | 3.22        | 0.02        | 0.91        | 1.46        | 0.25     |
| <b>97</b>  | 1.52       | 3.19        | 0.05        | 1.14        | 1.39        | 0.17     |
| <b>98</b>  | 1.5        | 3.16        | 0.1         | 1.59        | 1.29        | 0.08     |
| <b>99</b>  | 1.55       | 3.21        | 0.12        | 2.37        | 1.16        | 0.06     |
| <b>100</b> | 1.52       | 3.19        | 0.05        | 1.17        | 1.38        | 0.16     |
| <b>101</b> | 1.52       | 3.19        | 0.07        | 1.38        | 1.33        | 0.12     |
| <b>102</b> | 1.5        | 3.19        | 0.08        | 1.46        | 1.34        | 0.11     |
| <b>103</b> | 1.53       | 3.19        | 0.07        | 1.39        | 1.34        | 0.12     |
| <b>104</b> | 1.48       | 3.16        | 0.09        | 1.44        | 1.32        | 0.08     |
| <b>105</b> | 1.5        | 3.18        | 0.08        | 1.35        | 1.37        | 0.11     |

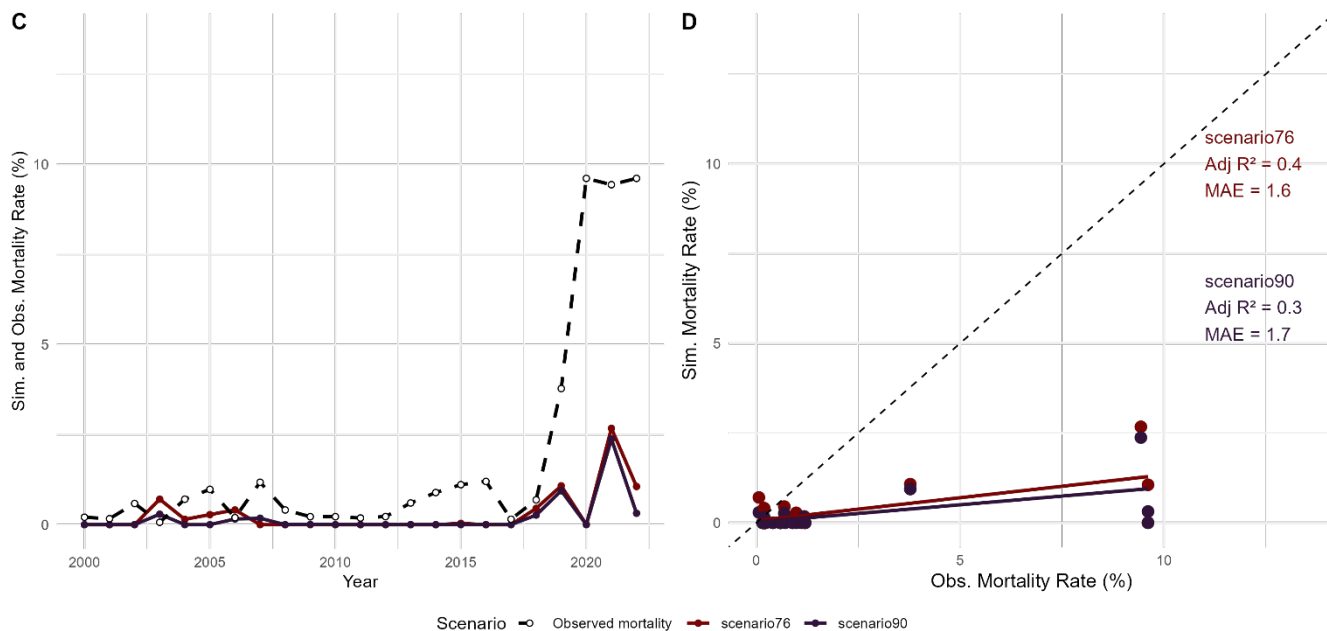

115

*Figure S 3.3.4.* – Simulated and observed mortality rate over time averaged across spruce sites and grouped by soil scenario in the absence of the bark beetle model. Only the two best performing scenarios are shown.
